# Supplementary material for: The African, Caribbean and European (ACE) Pathways to Care study: a qualitative exploration of similarities and differences between African-origin, Caribbean-origin and European-origin groups in pathways to care for psychosis
Source: PubMed Central journal article supplement — BMJ Open. 2015 Jan 14;5(1):e006562. doi: 10.1136/bmjopen-2014-006562 (PMC4298103; doi:10.1136/bmjopen-2014-006562), 2015-01-14
Supplement: bmjopen-2014-006562.draft_revisions.pdf [file bmjopen-2014-006562.draft_revisions.pdf]

# BMJ Open

## The African, Caribbean, & European (ACE) Pathways to Care Study: How stigma operates in defining differences in pathways to care for psychosis

|                                 |                                                                                                                                                                                                                                                                                                                                                                                                                                                                                                                                                                                                                                                                  |
|---------------------------------|------------------------------------------------------------------------------------------------------------------------------------------------------------------------------------------------------------------------------------------------------------------------------------------------------------------------------------------------------------------------------------------------------------------------------------------------------------------------------------------------------------------------------------------------------------------------------------------------------------------------------------------------------------------|
| Journal:                        | <i>BMJ Open</i>                                                                                                                                                                                                                                                                                                                                                                                                                                                                                                                                                                                                                                                  |
| Manuscript ID:                  | bmjopen-2014-006562                                                                                                                                                                                                                                                                                                                                                                                                                                                                                                                                                                                                                                              |
| Article Type:                   | Research                                                                                                                                                                                                                                                                                                                                                                                                                                                                                                                                                                                                                                                         |
| Date Submitted by the Author:   | 08-Sep-2014                                                                                                                                                                                                                                                                                                                                                                                                                                                                                                                                                                                                                                                      |
| Complete List of Authors:       | Ferrari, Manuela; Centre for Addiction and Mental Health (CAMH), Social Aetiology of Mental Illness (SAMI) Training Program -CIHR Strategic Training; York University, School of Health Policy and Management<br>Flora, Nina; Centre for Addiction and Mental Health (CAMH),<br>Anderson, Kelly; Western University, Department of Epidemiology & Biostatistics<br>Tuck, Andrew; Centre for Addiction and Mental Health (CAMH),<br>Archie, Suzanne; McMaster University, Department of Psychiatry and Behavioural Neurosciences<br>Kidd, Sean; Centre for Addiction and Mental Health (CAMH),<br>McKenzie, Kwame; Centre for Addiction and Mental Health (CAMH), |
| <b>Primary Subject Heading</b>: | Mental health                                                                                                                                                                                                                                                                                                                                                                                                                                                                                                                                                                                                                                                    |
| Secondary Subject Heading:      | Qualitative research, Health services research                                                                                                                                                                                                                                                                                                                                                                                                                                                                                                                                                                                                                   |
| Keywords:                       | Schizophrenia & psychotic disorders < PSYCHIATRY, QUALITATIVE RESEARCH, Child & adolescent psychiatry < PSYCHIATRY                                                                                                                                                                                                                                                                                                                                                                                                                                                                                                                                               |
|                                 |                                                                                                                                                                                                                                                                                                                                                                                                                                                                                                                                                                                                                                                                  |

SCHOLARONE™  
Manuscripts

## Title

**The African, Caribbean, & European (ACE) Pathways to Care Study: How stigma operates in defining differences in pathways to care for psychosis.**

Manuela Ferrari,<sup>a</sup> Nina Flora,<sup>a</sup> Kelly K. Anderson,<sup>b</sup> Andrew Tuck,<sup>a</sup> Suzanne Archie,<sup>c</sup> Sean Kidd,<sup>a,d</sup> & Kwame McKenzie<sup>a,d</sup> on behalf of the ACE Project Team

<sup>a</sup> *Social and Epidemiological Research, Centre for Addiction and Mental Health (CAMH)*

*Toronto, Ontario, Canada*

<sup>b</sup> *Department of Epidemiology & Biostatistics, Western University, London, Ontario, Canada*

<sup>c</sup> *Department of Psychiatry and Behavioural Neurosciences, McMaster University*

*Hamilton, Ontario, Canada*

<sup>d</sup> *Department of Psychiatry, University of Toronto*

*Toronto, Ontario, Canada*

**Correspondence:**

Manuela Ferrari, PhD

Social and Epidemiological Research

Centre for Addiction and Mental Health (CAMH)

455 Spadina Avenue, Suite 300

Toronto, ON M5S 2G8 CANADA

Phone: (416)535-8501 ext. 77614 Fax: (416) 979-0564

E-mail: manuela.ferrari@camh.ca

Word count : 6,433

## Abstract

**Objectives:** An inductive qualitative approach was used to examine differences in entering into first-episode psychosis (FEP) programs between young people from African, Caribbean, and European origin.

**Setting:** Ontario, Canada.

**Participants:** 35 participants in total. 26 young people who experienced a first episode of psychosis and nine family members. Participants were part of the African, Caribbean, and European (ACE) Pathways to Care Study.

**Results:** Factors that influenced help-seeking delays across the three groups were: personal awareness of symptoms, family members' knowledge of psychotic symptoms, and knowledge of mental health services. Youth and their family members described how stigma plays a key role in pathways to care by stopping them from asking for help. The way in which stigma operated among the three groups, from feeling ashamed to feeling guilty for their mental illnesses, helped to explain differences in DUP between the groups. Guilt feelings emerged as a prominent theme among members from the African and Caribbean groups; and it was not discussed in the European focus group. Delay in entering into first-episode psychosis (FEP) programs was also influenced by the stigma perceived by young people in health care settings. This had an impact on the therapeutic relationships, disclosure of symptoms, and overall trust in the health care system.

**Conclusions:** The findings of this paper suggest that stigma, especially internalized stigma, may operate in different ways in European-, African-, and Caribbean-origin groups. This could explain the differences in the pathways to early intervention services for psychosis for these young people. These findings could inform the development of more equitable services for people in early stages of psychosis.

**Keywords:** First-episode Psychosis; Pathways to Care; Duration of Untreated Psychosis; Stigma; Ethnicity.

### Strengths and limitations of this study

1. This paper reports a qualitative exploration of the reasons for differences in pathways to care and DUP between African-, Caribbean-, and European-origin groups.
2. The findings suggest that stigma, especially internalized stigma in African-, and Caribbean-origin groups, seems to explain differences in pathways to care between the three groups.
3. Delay in entering into first-episode psychosis programs was also influenced by the stigma perceived by young people in health care settings. This had an impact on the therapeutic relationships, disclosure of symptoms, and overall trust in the health care system.
4. Findings from this study could be used to inform anti-stigma initiatives and sensitivity training for key-players (e.g., general practitioners, emergency staff, police). Those initiatives should be developed through the lens of cultural knowledge of and beliefs about mental health problems.
5. The sample size in this study was relatively small; only limited inferences can be drawn for other groups.
6. The sample size was defined from the quantitative part of the study. We were not able to involve any family members of African origin as our original pool of participants was very small.

## Introduction

Psychotic disorders affect 1–2% of the population and are associated with a significantly shorter life expectancy and an increased risk of self-harm and violent victimization [1-8]. Members of immigrant groups have been reported to be at an increased risk of psychosis. A number of factors are considered to be contributory, such as social deprivation and disorganization, separation from parents, and the experience of discrimination [9-13]. The Canadian literature has reported differences in the use of services by members of immigrant groups [15-16]. There are barriers to getting care for many immigrant groups [15]. Both the Canadian and international literature has investigated differences in pathways to care and service use, and outcomes for people of Caribbean- and African- origin with psychosis [14,15]. A longer duration of untreated psychosis (DUP) and more coercive care pathways have been reported in the African- and Caribbean-origin groups in Ontario [16]; both these factors are associated with poorer outcomes [9-15].

The African, Caribbean, and European (ACE) Pathways to Care Study investigated pathways to care and the duration of untreated psychosis (DUP) in African-, Caribbean-, and European-origin groups in Ontario, Canada. The study identified differences in the pathways to first-episode psychosis (FEP) programs between the three groups. The median DUP was seven months for the European group, nine months for the African group, and 16 months for the Caribbean group. Caribbean participants in the study had fewer health services/providers in their pathways to care, they more often accessed FEP programs from an in-patient admission, and they faced more obstacles in their access to specialized treatment for psychosis than the

1  
2  
3 European group. African group members in the study more often had an emergency  
4  
5 department as first contact in their pathways [17].  
6  
7

8  
9 Once disparities have been identified, understanding of the reasons why they may exist  
10  
11 is necessary if we are to develop effective services. This paper reports a qualitative exploration  
12  
13 of the reasons for differences in pathways to care and DUP in the ACE Study from the  
14  
15 perspective of respondents to the study and their families. The aim was to understand  
16  
17 differences in DUP between African-, Caribbean-, and European-origin groups. To do so, we  
18  
19 explored young people's and their family members' journeys of seeking help for psychosis,  
20  
21 investigating how people responded to early signs of psychosis as well as the roles that  
22  
23 different people and services played in accessing specialized programs for psychosis.  
24  
25  
26  
27  
28

## 29 **Methods**

30  
31  
32 This study used an inductive qualitative approach to examine differences in the routes  
33  
34 to care between young people with lived experience of psychosis of African-, Caribbean-, and  
35  
36 European-origin. Focus groups were used as a means of generating in-depth knowledge of  
37  
38 pathways to care, exploring the interaction between individual socio-cultural positions, young  
39  
40 people' experiences of seeking help, and group dynamics—as each participant's narrative is  
41  
42 generated out of the journeys of others. By using focus groups we were able to examine how  
43  
44 participants (1) interacted with each other; (2) produced and reproduced knowledge; and (3)  
45  
46 articulated and/or defended their views [18].  
47  
48  
49  
50  
51  
52

### 53 *Participant Recruitment*

54  
55  
56  
57  
58  
59  
60  
Ethics approval was obtained from the Research Ethics Board (REB) at the Centre for

1  
2  
3  
4  
5  
6  
7  
8  
9  
10  
11  
12  
13  
14  
15  
16  
17  
18  
19  
20  
21  
22  
23  
24  
25  
26  
27  
28  
29  
30  
31  
32  
33  
34  
35  
36  
37  
38  
39  
40  
41  
42  
43  
44  
45  
46  
47  
48  
49  
50  
51  
52  
53  
54  
55  
56  
57  
58  
59  
60

Addiction and Mental Health, as well as from the REB at each participating hospital site of the ACE Study.

Our groups were based on the categories developed by the Toronto District School Board. Respondents were asked to choose which racial or ethnic group best reflected their identity (see Anderson et al. for more information) [17]. Participants who took part in the ACE Study's semi-structured interviews were asked if they were willing to be re-contacted. Only those who agreed were approached for the qualitative study. They were asked if they would take part in a two-hour focus group to discuss the results of the study. Participants' family members were also contacted and asked if they were willing to take part in a separate focus group.

Six focus groups with young people were envisaged: one male and one female group for each of the African-, Caribbean-, and European-origin groups. Three focus groups were organized for the family members, one for each of the African, Caribbean, and European groups. Because of difficulty recruiting for the African and Caribbean women's groups, we adjusted the study protocol and undertook individual in-depth interviews with young African and Caribbean women with lived experience of psychosis. The protocol change allowed us to have a small, but important, representation of women from these two groups.

#### *Data collection*

Focus groups were conducted by the first author, MF, who acted as focus group moderator, and research assistants who were trained in focus groups, transcribing, and qualitative data analysis for the purpose of this study. Focus group questions were designed to

1  
2  
3 be conversational, open, and clear. They unfolded according to Krueger and Casey's  
4  
5 recommendations: opening, introductory, transition, key, ending [18]. At the end of each focus  
6  
7 group, the research team involved in the focus group completed 30–40 minutes of debriefing.  
8  
9  
10 During the focus groups, participants were presented with preliminary ACE Study quantitative  
11  
12 data; we focused on the differences in DUP as well as pathways to care and asked participants  
13  
14 to comment on them.  
15  
16

17  
18  
19 Focus groups and in-depth interviews were digitally recorded. The digital audio files  
20  
21 were transcribed by the research assistants and reviewed for data accuracy. One research  
22  
23 assistant transcribed a focus group and the other reviewed the work done. Finally, all material  
24  
25 was also reviewed by MF. Focus group transcripts were then prepared to facilitate thematic  
26  
27 analyses. All participant names were changed to pseudonyms to ensure confidentiality.  
28  
29  
30

31  
32  
33 Traditional data saturation, that is, “collecting data until no new information is  
34  
35 obtained,” [19, p. 147] is often an object of controversy in qualitative research literature [19].  
36  
37 We used instead Morse's criterion of data saturation as “adequacy” of the data, which can be  
38  
39 obtained through specific methodological choices. These methodological choices were (a)  
40  
41 selecting and working with an ethnic- and gender-cohesive sample; (b) at the same time,  
42  
43 working with three different ethnocultural groups so as to maximize and explore cultural  
44  
45 contrasts in pathways to care—a gap in current literature; and (c) basing our sample on  
46  
47 quantitative data analysis, which allowed focus-group member checks on the quantitative  
48  
49 findings, as well as the possibility for rich, full, and complete understanding.  
50  
51  
52

53  
54  
55  
56 Finally, Lincoln and Guba [20] defined primary criteria to assess rigour and  
57  
58  
59  
60



1  
2  
3 trustworthiness of the qualitative research process. Primary criteria—credibility, authenticity,  
4  
5  
6 criticality, and integrity—are necessary to all qualitative enquiry but they are insufficient in and  
7  
8  
9 of themselves. Trustworthiness was achieved within the study through the following criteria:  
10  
11 *credibility* and *authenticity*, attained through multiple sources of data (e.g., pathways maps  
12  
13 generated from semi-structured interviews, chart reviews, focus groups' data) as well as  
14  
15 specific and different sample strategies being employed to generate rich and meaningful data;  
16  
17  
18 *criticality* and *integrity*, using team debriefing and analysis to ensure methodological  
19  
20 effectiveness.  
21

## 22 23 24 *Analysis*

25  
26  
27  
28 Thematic analysis was employed to identify, analyze, and report patterns or themes  
29  
30 within data [20]. Our thematic analysis was data driven, rather than theoretically driven,  
31  
32 making use of an inductive approach, as the themes identified were strongly linked to the data  
33  
34 themselves. We followed Braun and Clark's steps [21] of thematic analysis. We compared each  
35  
36 participant's journey to care (shared during the focus group), the pathway depicted during a  
37  
38 semi-structured interview, and the participant's medical chart. Further, we performed an  
39  
40 analysis within each ethnic group, comparing and contrasting young people's narratives with  
41  
42 those of family members, and a cross-ethnic-group analysis. As a result, in the study findings we  
43  
44 describe themes that were common across all the narratives as well as the ones that were  
45  
46 different between the three ethnic groups.  
47  
48  
49  
50  
51

## 52 53 54 55 **Results**

### Overview of the sample

A total of 35 people took part in the study; 26 young people with lived experiences of psychosis (origins: European = 17, African = 5, Caribbean = 4) and nine family members (origins: European = 6, African = 0, Caribbean = 3). Table 1 reports the socio-demographic information for young people with lived experiences of psychosis only –no socio-demographic information were collected for family members at the time of the focus group.

Findings are presented in two main sections: (1) *Understanding help seeking*, in which we first present commonality across the three groups, and then we investigate differences in DUP between African-, Caribbean-, and European-origin groups. In this section we unpack the role of stigma and how it operates early on in pathways to care. In this paper, stigma refers to a collection of negative attitudes, beliefs, and behaviours against people with mental disorders, which are manifested in rejection, avoidance, prejudice, and discrimination of people with mental illness conditions [22,24]. Stigma can be a barrier for people who experience mental health problems by making them reluctant to ask for help due to fear of prejudice, being labelled, and discrimination by others. Internalized stigma, or self-stigma, occurs when a person takes on those negative stereotypes and assumptions and applies them to themselves [23, 24]. Discrimination due to mental health stigma can take place in different circumstances/settings: education, employment, housing, and treatment. (2) *Understanding delay in entering first-episode psychosis (FEP) programs*, which explores the relationship between negative experiences, stigma, health care delivery, and illness/symptoms disclosure. The themes presented in this section are also common across the three groups. All young people's and family members' names used in this paper have been changed to ensure participants'

1  
2  
3 confidentiality.

4  
5  
6  
7 *Understand help seeking*

8  
9  
10 Common across the three groups: Knowledge, awareness, and mental health stigma

11  
12 Consistent across all narratives, for both young people and family members, was that  
13 knowledge or lack of knowledge about symptoms of psychosis, mental illness, and services  
14 available to them was key to them recognizing the significance of changes in behaviour. Often  
15 this knowledge was based on family members' or friends' past experiences of mental illness.  
16  
17  
18  
19  
20  
21

22  
23  
24 Maria: The one person who really helped me to realize what I'm going through, and that I  
25 need help, is my mother. She knows what I'm going through because she went through it  
26 with my father. She helps me a lot ...  
27

28 (European youth focus group)  
29  
30  
31

32 Young people who did not have any knowledge of signs or symptoms of psychosis were  
33 aware of personal changes but did not know that they were indicative of mental illness. In  
34 these cases, family members played a key role in the help-seeking process by taking them to  
35 the hospital.  
36  
37  
38  
39  
40  
41

42  
43 Benjamin: I was schizophrenic, and I didn't know what to do. I heard voices and stuff. I did  
44 some stuff that I couldn't remember, so some people took me in-

45  
46 Paul: I kept hearing ... weird voices, but I didn't know what is. So, later on I came ... my  
47 parents took me to the hospital ...  
48

49 (African youth focus group)  
50  
51

52 Steve: I didn't know that I needed help. I had no one around me who knew what was  
53 happening. ... I was staying with a friend, my mom was occasionally stopping by ... she saw  
54 certain signs in me, and she immediately drove me to [name of the hospital].  
55

56 (Caribbean youth focus group)  
57  
58  
59  
60

1  
2  
3 June: I wouldn't have stayed in the emergency room, I wouldn't have gone by myself ... I  
4 didn't know what was going on. ... I didn't know *I was going crazy*, ... I thought everybody  
5 was against me.  
6

7  
8 (European youth focus group)  
9

10  
11  
12 Young people and family members who did not have awareness or knowledge of the signs or  
13 symptoms of psychosis struggled the most to understand and/or make sense of the situations.  
14

15  
16  
17  
18 Janine: I didn't know what this illness was. I thought it was just some kind of behaviours,  
19 being angry or strange like teenagers could possibly experience sometime ... it was people  
20 from the outside who used to tell me "No this more than just ... you know teenager's  
21 crisis." Not knowing [the] symptoms ... I just didn't know what was going on really.  
22

23  
24 (Caribbean family members' focus group)  
25

26  
27  
28 Louise: My son was 17 when he had his psychotic break. I thought he was just being a  
29 typical rebellious teenager ... he smoked pot. He didn't get violent. He was so scared and I  
30 didn't know what else to do with him. I took him to (name of general hospital) ... after  
31 about 15 hours convincing them that I was not taking him home, they admitted him.  
32

33  
34 (European family members' focus group)  
35

36  
37  
38 Often, family members attributed the changes in their relatives' behaviour to growing up/going  
39 through adolescence, peer groups/wrong crowds, stress, and/or substance abuse in young  
40 adults. Family members often thought that what their relatives were experiencing was just a  
41 temporary phase in their relatives' lives without recognizing signs or symptoms of psychosis.  
42  
43 Help seeking often occurred after doubting the early signs of psychosis and, most importantly,  
44 after feeling sadness and discomfort.  
45  
46  
47  
48  
49  
50  
51

52  
53  
54 Along with knowledge and awareness of signs or symptoms of psychosis, the role that  
55 stigma played during the help-seeking process was also constantly present in the narratives.  
56  
57  
58  
59  
60

1  
2  
3 Through the analysis conducted, it was possible to identify how individual and family  
4 perceptions of mental illness influenced the internalization of stigma. For example, young  
5  
6 people involved in the study often distinguished between their rational understandings of the  
7  
8 mental health problems, symptoms, and causes, and, at the same time, their feelings of being  
9  
10 trapped in emotions such as shame.  
11  
12  
13  
14

15  
16  
17 Karen: People are scared to look for help, and to ...

18  
19 Maria: And to admit to themselves even ... [Karen: Yeah!] that “I have schizophrenia”... I  
20 never told anybody.  
21

22 June: I’m still ashamed of what I have.  
23

24 Samantha: Me too.  
25

26 (European youth focus group)  
27  
28  
29  
30

31 Participants described how, for fear of family members’ and/or friends’ reactions to their  
32 conditions, they tried to ignore the signs and symptoms by, for example, using marijuana, and  
33 attempted to hide their symptoms from others.  
34  
35

36  
37 Sandi: I was worried about what people around me might say ... once you’re in the  
38 hospital you can’t really keep your secret anymore. There is a huge stigma about mental  
39 illness; people tend to like to avoid it.  
40  
41

42 (European youth focus group)  
43  
44  
45  
46

47 Positive symptoms (e.g., hearing voices, bizarre behaviour, violence) were often  
48 catalysts to treatment initiation. Family members often struggled to recognize when their  
49 relative was no longer able to care for himself/herself or when he/she was asking for help as  
50 the symptoms of psychosis took over his/her ability to make decisions. This created quite a  
51 complex situation where family members felt threatened or worried about their safety and, at  
52  
53  
54  
55  
56  
57  
58  
59  
60

1  
2  
3 the same time, guilty when they had to call the emergency department, ambulance, or,  
4  
5  
6 unfortunately, the police. This was evident in family members' narratives.  
7  
8

9  
10 Natali: I have been there ... I couldn't stop crying for days ... when my daughter finally  
11 broke down at school ... being scary violent with us. ... the first time she finally did get to  
12 the hospital that day [name of the hospital] ... It was almost like a relief, she was safe and  
13 she was away from us ... because we were scared. We were so afraid. [Sarah:  
14 (overlapping) Yes. Yes. Yeah.]  
15

16 (European family members' focus group)  
17  
18  
19

20  
21 Stigma was also closely connected to how much the person who experienced psychosis was  
22 considered responsible for his/her mental condition or was in control, or not, of his/her  
23 symptoms. Family members recognized that mental illness is not perceived the same as other  
24 health problems. Physical disorders, such as cancer, generate compassion in extended family  
25 members, whereas mental disorders bring reactions of distancing, blaming, and stigmatizing  
26 from members of the extended family.  
27  
28  
29  
30  
31

32  
33 Natali: Unfortunately, I still see ... my family members not so supportive. On the surface,  
34 they are, but I see them shy away from my son. I see the stigma, it is still so much there. If  
35 she was (clears throat) you know physically ill they would be right there.  
36

37 (European family members' focus group)  
38  
39  
40  
41

42 Overall, family members described how psychosis is hidden until it manifests through a  
43 person's behaviours. It is difficult to understand what is happening to the person as well as to  
44 assess if, when, and how to intervene.  
45  
46  
47  
48

49  
50 Differences in help seeking between the three groups: Internalized stigma as feeling shame  
51  
52 versus feeling guilty for their own condition  
53  
54

55  
56 Participants of European origin internalized mental health stigma as shame about their  
57  
58  
59  
60

1  
2  
3 symptoms (e.g., hearing voices, unpredictable or bizarre behaviours in front of family and  
4 friends, or irrational actions). They felt distress caused by the awareness of their past bizarre  
5 behaviours and a sense of humiliation for their conditions. In contrast, young people from  
6 African- and, even more, Caribbean-origin groups stressed their responsibility for their  
7 conditions, they felt that they committed something wrong (for having an mental illness), and a  
8 sense of failure for not being able to “snap out of it”—as a participant described during a focus  
9 group. In this sense, they seemed to internalize mental health stigma as guilt—there is shame  
10 and humiliation but also they felt that they had done something wrong  
11  
12  
13  
14  
15  
16  
17  
18  
19  
20  
21  
22  
23

24 Paul: ... there was a lot of pressure to excel in school and succeed. I dabbled too much in,  
25 dabbled too much in drugs, that was my problem ... that was really my fault. I have no  
26 one else to blame but myself ... people expect you to just walk it off kind of thing. But you  
27 really, you really can't, you can't really walk off a mental illness ... you can cope with it.  
28  
29

30 (African youth focus group)  
31

32 Steve: Going through a mental illness totally flipped the way I view ... everything! It's also  
33 made me become more aware of how family members react, and why are they reacting  
34 that way. Eventually it is what got me onto the culture of it, my religion, and so forth. I  
35 can't say exactly what it is about the Caribbean culture ... but, I can tell, those two things  
36 definitely play a factor in it.  
37  
38

39 (Caribbean youth focus group)  
40  
41  
42  
43

44 In the African and Caribbean focus groups, participants discussed the role that religion  
45 had in shaping their and their families' perceptions of mental illness and feelings of guilt for  
46 their condition—this topic was not discussed in the European focus groups. In some cases,  
47 people described how they grew up thinking that mental illness was a sin or God's punishment.  
48 Although they did not think in this way now, they saw how this perception influenced their  
49 understanding of early signs of psychosis, the focuses of their paranoid symptoms (in some  
50  
51  
52  
53  
54  
55  
56  
57  
58  
59  
60

1  
2  
3 cases), and, most importantly, their asking for help.  
4  
5

6  
7 Suzanne: Well, it made me feel badly because I thought, “Wow. You know, she’s so  
8 nervous [mother] about me going to the hospital for help.” It made me feel kind of  
9 ashamed that I needed help. And then, my mom called me CRAZY. She didn’t call me  
10 mentally ill. She said, you know, “Suzanne is little crazy”... she wasn’t using the right  
11 terminology, but that hurt my feelings. Yeah. I guess it made me a little bit reluctant to  
12 seek care later on. [Later on in the interview] ... in the beginning my mom was like,  
13 “Suzanne you need to PRAY more. That’s the problem.” And, I’m like, “No mom, I need  
14 medication. I need some help.” Mom said, “It’s ‘cause you’re not praying enough and  
15 because you stopped going to church.” And now she’s like, “Suzanne, did you pray  
16 today?” And I’m like, “Mom, no I didn’t pray.” And she’s like, “I’m telling you you’ll get  
17 better, if you start praying.” She REALLY BELIEVES it. Sometimes I just tell her that I  
18 prayed just so she can get off my case. My brother often tell me that my life has gone in  
19 this direction because I stopped going to church. ... It makes me feel bad. It’s not helpful  
20 me to get better.  
21  
22  
23

24  
25 (Caribbean youth interview)  
26  
27

28  
29 Greg: I can’t say everybody but, A LOT of people in my family, and in the community ...  
30 they become very superstitious. It’s a mind job with Catholicism first of all—and no  
31 offense to anybody here who’s Catholic, I am Catholic. Something simple as, as having a  
32 mental condition, is not simple in this world anymore, it becomes then, “that person  
33 needs to be exorcised, or that person’s got bad demons—”  
34  
35

36 Steve: (overlapping) Oh, I’ve heard ... I’ve heard that, I’ve heard that, to get rid of my  
37 voices I have to get an exorcism.  
38  
39

40 Greg: Yeah.  
41

42 Steve: That’s what I heard from a friend.  
43

44 Greg: Like, my mom said that when she was uh, a kid, when she was like 5 or 6, she  
45 actually witnessed someone getting exorcised, because of voices in his head and stuff like  
46 that.  
47

48  
49 (Caribbean youth focus group)  
50  
51

52  
53 As described, African- and, even more, Caribbean-origin young people reported that their  
54  
55 mental illnesses were taboos among members of their close or extended families. While young  
56  
57  
58  
59  
60



1  
2  
3 people of African origin had their families around to support their struggles, young people of  
4  
5 Caribbean origin who attended the focus groups had no one or only a few close family  
6  
7 members. The support networks that could assist them in seeking help were not available.  
8  
9

10  
11 Simone: When people in the Caribbean get to know that your child has this issue [mental  
12 illness] ... the whole family is labelled ... from the grandparent right the way down. The  
13 family is labelled and you are sort of ostracized. That's why many of us don't want to  
14 bring it up to the light ... we are in denial that this is not happening to this family. ... We,  
15 as parents, don't have the freedom to talk about it ... because of the stigma that's still  
16 attached ... we internalize it. When we internalize, we're stressed. We would love to know  
17 that there is somewhere that we can go and sit down and talk. We need to unload but we  
18 have no place to unload.  
19

20  
21  
22 (Caribbean family members' focus group)  
23  
24  
25  
26

27 African- and Caribbean-origin participants described how when they experienced early  
28 signs of psychosis they tried to control them and they felt guilty if they were not able to. Their  
29 sense of guilt was also connected with cultural interpretation of mental illness as sin, God's  
30 punishment, and a taboo illness heavily stigmatized—themes more present in the Caribbean-  
31 origin focus group and interviews.  
32  
33  
34  
35

### 36 37 *Understanding delay in entering first-episode psychosis programs (FEP)* 38 39

40 Rachel: Now none of these people [university psychological service/psychiatrist] told me  
41 about any other resources. ... All I knew was [name of mental health hospital], which was,  
42 like, the last resort. ... I was in the dark. And then I went to my family doctor, and she was  
43 the first person after like 3 months who told us that, "Oh, there's actually an inpatient  
44 program at [name of a general hospital], for if you're in an emergency—go there." ... So  
45 then when I got really bad, I was in the inpatient at [name of a general hospital] and  
46 there, it was when I actually found out about a bunch of other resources ..."  
47  
48  
49

50 (European youth focus group)  
51  
52  
53

54 Participants often recognized changes in behaviours and thinking but they did not always  
55 attribute these to a mental illness; however they were active in seeking help, contacting  
56  
57  
58  
59  
60

1  
2  
3 community services (e.g., school or university health services) or their family doctors, if they  
4 had one. In reflecting on their pathways, they often felt upset, as early attempts to ask for help  
5 were dismissed by providers and/or information was not provided to them.  
6  
7  
8  
9

10  
11 Negative experiences, stigma and care: First contact, therapeutic relationship, and disclosure of  
12 symptoms  
13

14  
15  
16  
17 Once in the system, groups' differences in the journeys to specialized treatment seemed  
18 less present. Before entering into early intervention programs, young people saw between four  
19 and six difference health providers/services (e.g., family doctor, emergency, police, detention  
20 centre, in-patient unit). As young people described, the care they received (or did not receive)  
21 and health care providers' attitudes towards mental illness influenced what they shared about  
22 their mental states (e.g., hearing voices, suicidal thoughts) and, overall, their trust in the  
23 system. From the first contact with a hospital, the majority of young people involved in the  
24 focus groups reported that, if it was a negative experience, it affected their therapeutic  
25 relationships, and, generally, their willingness to stay in the system and to return, if needed, a  
26 second time.  
27  
28  
29  
30  
31  
32  
33  
34  
35  
36  
37  
38  
39  
40  
41  
42

43 Samantha: From my experience there's a lot of stigma and shame surrounding people  
44 who have substance abuse problems. Whenever I've been in treatment, there has not  
45 been an accepting atmosphere for me to discuss my issues or to make me feel like I'm  
46 actually going to get help.  
47

48  
49 (European youth focus group)  
50  
51  
52

53 Steve: Well, I found, like, a number of them [mental health care providers] definitely  
54 helped. I feel that the majority of [hospital name] staff definitely does have that, but  
55 there are still the ones that can create that negative experience for you when you're  
56 already going through a negative experience. ... It's funny ... you're going through stuff,  
57  
58  
59  
60

1  
2  
3 even though your mind's not in the right place, you still remember all the negativity. ...  
4 [Andy: (overlapping) Yeah.] Yeah. Those are the things that I will always remember,  
5 about, [name of the hospital], and dealing with [the staff] at the first time. Like, although  
6 they were there to help me, it didn't seem like half had actually studied mental health at  
7 all.  
8  
9

10 (Caribbean youth focus group)  
11  
12  
13

14  
15 During the focus groups and interviews, participants reported how their experiences of  
16 poor quality of care was due to health providers' negative attitudes and behaviours towards  
17 mental illness. Indeed, stigma does operate, albeit marginally, in mental health services, such  
18 as primary care (e.g., family doctors), emergency departments, in-patient units, out-patient  
19 units, and so on and, when present, it seems to be more hurtful than when experienced outside  
20 the health care system.  
21  
22  
23  
24  
25  
26  
27  
28  
29  
30  
31  
32

33 Eight young people who took part in the focus groups had police and detention centres  
34 as early contacts in their pathways to FEP treatment. Overall, police officers were perceived to  
35 be supportive, helpful, and understanding of the situations. Police officers have the duty to  
36 respond to an emergency call, accompany the person to the hospital emergency room, and stay  
37 with them until the hospital staff takes over.  
38  
39  
40  
41  
42  
43  
44  
45

46 Linda: I did it twice. The first time, I went to the hospital was in an ambulance, and, the  
47 second time was ... in a police car. I actually found the police were nice. Like, I was in  
48 handcuffs [laughter], but I found them to be really nice ... they stayed with me until the  
49 doctors started seeing me. They didn't judge me, and I asked the one cop if he was  
50 married ... he was like showing me pictures of his kids. He was just nice.  
51  
52

53 (European youth focus group)  
54  
55  
56  
57  
58  
59  
60

1  
2  
3 Three men of European origin had forensic services in their pathways. In these cases, the young  
4  
5 men had to stay in detention for several days before they were able to see a judge. During the  
6  
7 focus groups they described how they were exposed to verbal and physical violence as well as  
8  
9 the trauma of experiencing psychotic episodes while in detention.  
10  
11  
12  
13

14 Rob: Well, for me the cops were ok. But, then at the detention centre, I said something  
15 really dumb to the correctional officer and ... I'm walking ... he literally just POUNDS me,  
16 he beat the shit out of me. Right there on the ground. I wasn't shaken by it at all because I  
17 was psychotic, but like—I don't know, it was really weird. He literally took me from  
18 behind and just pounded me. I guess his superior comes in and takes him off me. I guess  
19 the cops are ok but the guys in the jail ...  
20  
21  
22

23 Matt: Yeah, I had the same experience. One time, when I was psychotic, my mom called  
24 the police on me ... She meant for me to go to the hospital but I got charged by the police  
25 with a bunch of things. They sent me to JAIL, and I was completely psychotic ... they didn't  
26 know what to do with me. They were physical with me, they injected me in the back of  
27 my neck with I don't know what medication. They just locked me in a jail cell for probably  
28 a month until I was transferred to a medical facility.  
29  
30

31 (European youth focus group)  
32  
33  
34

35 It was interesting to notice that men of European origin were able to share these experiences  
36 during the focus group, whereas men of African and Caribbean origin just mentioned police  
37 involvement in their pathways without elaborating on it. We realized the sensitivity of this topic  
38 which, combined with the sense of guilt, probably precluded any further disclosure.  
39  
40  
41  
42  
43  
44  
45

46 In total, 10 youth had family doctors as first contact in their pathways. Among all focus  
47 groups, there was only one case in which referral was made to an FEP program directly by a  
48 general practitioner. The majority of them reported to have been misdiagnosed or had their  
49 symptoms dismissed by their family doctors.  
50  
51  
52  
53  
54  
55  
56  
57  
58  
59  
60

1  
2  
3 Benjamin: ... the family doctor doesn't, uh well, didn't work for me, he thought it was just  
4 anxiety, like ... anxiety because of school ... 'cause I was going into university.  
5  
6

7 (African youth focus group)  
8  
9

10  
11 In other cases, a young man and woman described how their family doctor focused only on  
12 their substance abuse problem and reprimanded them for their behaviours.  
13  
14

15  
16  
17 Steve: I kind of did [went to see my family doctor at first], but, he turned me down flatly,  
18 'cause I was smoking weed. I said, "I thinking, I'm suffering with depression." He asked me  
19 if I did drugs, I said that I did smoke weed quite often, and he said stop smoking the weed  
20 then "come back and I help you." I never heard about it after that. Next time, I saw him, I  
21 had to tell him that, yeah, I was diagnosed with schizophrenia. So, my general  
22 practitioner, unfortunately, wasn't able to do anything at the time.  
23  
24

25 (Caribbean youth focus group)  
26  
27

28 Jill: I recognized the symptoms but I didn't know the specifics of my diagnosis. I went to  
29 the family doctor and explained that I felt that I was being followed and everything. And  
30 then he told me, "Okay. You need to stop doing drugs," 'cause I was high on marijuana  
31 when it first happened ... but [it happened] several time [before] and I just thought it was  
32 the pot.  
33  
34

35 (African youth interview)  
36  
37

38  
39 It may be difficult for general practitioners to diagnose psychosis early; however, participants  
40 felt that they had actively sought help but their requests were misunderstood or dismissed.  
41  
42

43  
44 When admitted to emergency units or in-patient services, participants described the  
45 following negative experiences: being labelled, feeling like a number, feeling no longer a person  
46  
47 but an illness, being judged for behaviours/symptoms, and/or being treated like a child.  
48  
49

50  
51  
52 Matt: I don't know, how it makes sense, but [hospital staff] were almost like TOO nice ... I  
53 don't know the word, like, treating you like you're a child ... talking down to you. It was  
54 NICE, but it didn't make me feel better ... other people were nice but, at the same time ...  
55 made you feel like an equal. I felt like that was important.  
56  
57  
58  
59  
60

1  
2  
3 Steve: I think maybe the word you were looking for was “pity.” Like we were treated with  
4 PITY [Matt: Yeah.] Yeah. I think that, people think that people with schizophrenia are  
5 somehow STUPIDER or something ... I don’t think people with schizophrenia are stupid at  
6 all.  
7  
8

9 (European youth focus group)

10  
11 Robin: They treat you like a number [mumbles of agreement].  
12

13 Samantha: When I went to the hospital last time ... I was going through a panic attack  
14 when I FIRST found out I had schizophrenia, and they, the nurse was like, “Yeah, you’re  
15 just faking it, you’re perfectly fine, nothing’s wrong with you.”  
16  
17

18 Robin: Yeah.  
19

20 Samantha: It really, made me not like being in the hospital. I did not want to go back  
21 there ever.  
22

23 Natali: I agree. I think they treat you more like a number. And I think, being treated like  
24 a PERSON instead of a number or a case because, if you’re just a case, you’re like “I’m  
25 schizophrenic”... you’re not a person, anymore [mumbles of agreement].  
26  
27

28 (European youth focus group)  
29  
30  
31  
32

33  
34 According to young people, all of these factors influenced the therapeutic relationship  
35 with services and providers and, in particular, affected young people’s disclosures of  
36 symptoms—as described.  
37  
38  
39

## 40 41 42 Discussion

43  
44  
45 Differences in pathways to care and the duration of untreated psychosis have been  
46 reported in some studies of ethnic minority groups. The reasons for these differences are  
47 unclear. In this paper, the authors focused on participants’ narrative accounts to investigate the  
48 social and cultural contexts of help seeking. In doing so, we were able to further investigate  
49 differences between the groups as well as how a number of factors, including stigma,  
50  
51  
52  
53  
54  
55  
56  
57  
58  
59  
60

1  
2  
3 influenced both help seeking and access to specialized programs. We developed preliminary  
4  
5 hypotheses about the link between internalized stigma, cultural beliefs about mental illness,  
6  
7 and help seeking. At the same time, we discussed how interactions with health care settings  
8  
9 shape the experience of asking for help, influencing future engagement with health providers  
10  
11 and/or willingness to disclose symptoms.  
12  
13  
14

15  
16  
17 In our attempt to understand differences in the pathways to care and DUP between  
18  
19 African-, Caribbean-, and European-origin groups, we found similarities to other studies that  
20  
21 broadly explore help seeking among young people in FEP programs [25,26] and their families  
22  
23 [27,29] without focusing on ethnicity. As with our findings, other qualitative works described  
24  
25 long and difficult periods from the realization of signs and symptoms of psychosis to the  
26  
27 initiation of help seeking [27-31]. Family members' knowledge of mental illness and services  
28  
29 available to them was important in dealing with the situations. However, as other studies  
30  
31 described, family members often mistook early signs of psychosis—especially in the prodromal  
32  
33 phase of the illness—for mood changes due to adolescence, social withdrawal, stress, or drugs  
34  
35 [25-29]. At the same time, even if the young people who took part in our study, recognized  
36  
37 changes in themselves, they did not attribute these changes to mental illness—as was also  
38  
39 described in other studies [25,29,31]. Moreover, as we discussed, because of the associated  
40  
41 stigma, young people and family members engaged in denial, avoidance, and hiding of early  
42  
43 symptoms of psychosis.<sup>25-31</sup>  
44  
45  
46  
47  
48  
49  
50  
51

52  
53 In *Stigma*, Goffman [22] defined and discussed stigma as *discredited* versus  
54  
55 *discreditable*; in the first case, a visible and physical mark defines stigma, where, in the second,  
56  
57  
58  
59  
60

1  
2  
3 no visible or physical mark is present—as is the case with the stigma of mental illness. More  
4  
5 recently, further theories have been developed and used to understand the relationship  
6  
7 between stigma and mental illness (see Link & Phelan [23], and Corrigan [24]). In all of these  
8  
9 theories, stigma is based on signs that define who is different, stereotypes about the person or  
10  
11 group, marginalization, avoidance, discrimination, fear of what or who is different—where  
12  
13 normality and abnormality or similarity and difference are defined by socio-cultural norms and  
14  
15 beliefs. Furthermore, internalized stigma seems more distractive and harmful for the affected  
16  
17 person’s health and, broadly, for his/her sense of self [32].  
18  
19  
20  
21  
22  
23

24  
25 Several studies investigate stigma and mental illness [32,33]. Stigma about mental  
26  
27 illness is prevalent in the general public but, unfortunately, occurs in health and mental health  
28  
29 settings as well [32,33]. Work done in the Canadian context recognizes the role of stigma in  
30  
31 seeking help for mental illness in immigrant and refugee groups in Canada. The *Improving*  
32  
33 *mental health services for immigrant, refugee, ethno-cultural and racialized groups: Issues and*  
34  
35 *options for service development* report describes how immigrants, refugees, and racialized  
36  
37 groups are less likely to ask about mental health systems because of possible stigma and this  
38  
39 leads to people either not getting treatment or to a delay in getting treatment [15]. Other  
40  
41 studies describe the specific needs and issues that immigrant groups are facing in relation to  
42  
43 mental health services in urban settings in Canada [34,35]. These studies, which were  
44  
45 conducted with West Indian immigrants in Montreal, focus on cultural beliefs in non-medical  
46  
47 interventions as the preferred form of treatment for mental illness (e.g., prayer or traditional  
48  
49 folk medicine) or on the perception of primary care (e.g., doctors often prescribing  
50  
51  
52  
53  
54  
55  
56  
57  
58  
59  
60



1  
2  
3 pharmaceutical medications, or lack of time from physicians in early encounters that deterred  
4 the use of current health services) [34,35].  
5  
6  
7  
8

9  
10 There are similarities but also differences with our findings compared to other studies.  
11 This paper describes how stigma operated on young people and family members of African,  
12 Caribbean, and European origin and how it influenced the help-seeking process. Although all  
13 young participants internalized stigma as shame, and they feared lifelong discrimination for  
14 their mental health conditions, those of African and Caribbean origin also internalized a sense  
15 of guilt for their conditions. As mentioned, Caribbean young people described the role of  
16 cultural beliefs about mental illness and of religion in delay in getting treatment. African and  
17 Caribbean young people were able to distinguish the difference between their own beliefs  
18 about mental illness and those of their cultural groups. They were critical of traditional cultural  
19 beliefs, that see mental illness as a sin for which praying to God is a solution. However, the  
20 stigma has been internalized as guilt, which influenced their decisions to seek help. It could be  
21 that young people of Caribbean origin waited longer to ask for help as a way to protect their  
22 families from being labelled with a taboo illness; future studies are needed to verify this  
23 hypothesis. As family members of Caribbean origin described, there is a desire and need to find  
24 a space and place to bring to light these issues: “We need to unload but we have no place to  
25 unload.”  
26  
27  
28  
29  
30  
31  
32  
33  
34  
35  
36  
37  
38  
39  
40  
41  
42  
43  
44  
45  
46  
47  
48  
49  
50

51 Although the analysis presented in this paper helps in the understanding of some of the  
52 differences in DUP between African-, Caribbean-, and European-origin immigrants, we  
53 recognize that this work has some limitations, listed in Table 2. We were able to ask to both  
54  
55  
56  
57  
58  
59  
60

1  
2  
3 young people and family members for possible strategies which could be used to support  
4  
5 people in the help-seeking process and for ideas about how the system of care could be  
6  
7 improved (see Table 3). All participants described the importance of anti-stigma initiatives in  
8  
9 different settings (e.g., schools, universities, primary care services/providers) and targeted to  
10  
11 different groups. Based on our findings, such initiatives should be developed through the lens  
12  
13 of ethnocultural knowledge of and beliefs about mental health problems.  
14  
15  
16  
17  
18  
19

## 20 **Conclusion**

21  
22  
23 The findings of this study suggest that stigma, especially internalized stigma, operates in  
24  
25 different ways in European-, African-, and Caribbean-origin individuals and that this could  
26  
27 explain the differences in the pathways to early intervention services for psychosis for these  
28  
29 young people. These findings could inform the development of targeted anti-stigma campaigns  
30  
31 as well as the implementation of more equitable services for people in early stages of  
32  
33 psychosis. To do so, trust needs to be redefined and gained between ethnocultural groups and  
34  
35 mental health researchers/providers both in research and in clinical practice. Implementing a  
36  
37 community-based participatory framework could help to achieve this goal.  
38  
39  
40  
41  
42  
43  
44

45 **Contributorship statement** KM contributed to the conception of the study. MF, NF, KA, and KM  
46 developed the qualitative study protocol and materials. MF and NF implemented the focus  
47 groups and MF implemented the individual interviews. MF performed data analysis, assisted by  
48 NF, than they presented findings to all the authors in different stages of the process. MF wrote  
49 the manuscript and it was than revised by KM. All authors reviewed and approved the final  
50 manuscript.  
51

52  
53 **Competing interests** The authors have no conflicts of interest with respect to the publication of  
54 this manuscript.  
55  
56  
57  
58  
59  
60

1  
2  
3 **Funding** This study was funded by a Canadian Institutes of Health Research (CIHR) Operating  
4 Grant (Grant #220976).  
5  
6

7 **Data sharing** No additional data available.  
8

9  
10 **ACE Project Team:**

11 Kelly K. Anderson,<sup>a</sup> Suzanne Archie,<sup>b</sup> Philippe-Edouard Boursiquot,<sup>b</sup> Julie Buffett,<sup>b</sup> Denise  
12 Canso,<sup>a</sup> Manuela Ferrari,<sup>a</sup> Nina Flora,<sup>a</sup> Lew Golding,<sup>a</sup> Hayley Hamilton,<sup>a,c</sup> Asante Haughton,<sup>a</sup>  
13 Sean Kidd,<sup>a,c</sup> Laurence Kirmayer,<sup>d</sup> Steve Lurie,<sup>e</sup> Kwame McKenzie,<sup>a,c</sup> Marianne Noh,<sup>a</sup> Samuel  
14 Noh,<sup>a,c</sup> Karen O'Connor,<sup>e</sup> Jennifer Parlee,<sup>a</sup> Syb Pongracic,<sup>a</sup> Delia Reuben,<sup>a</sup> Rebecka T. Sheffield,<sup>b</sup>  
15 Laura Simich,<sup>c</sup> Taryn Tang,<sup>c</sup> Andrew Tuck<sup>a</sup>  
16  
17

18  
19 <sup>a</sup> Social and Epidemiological Research, Centre for Addiction and Mental Health (CAMH) Toronto,  
20 Ontario, Canada

21 <sup>b</sup> Department of Psychiatry and Behavioural Neurosciences, McMaster University  
22 Hamilton, Ontario, Canada

23 <sup>c</sup> Department of Psychiatry, University of Toronto  
24 Toronto Ontario, Canada

25 <sup>d</sup> Division of Social and Transcultural Psychiatry, McGill University  
26 Montreal Quebec, Canada

27 <sup>e</sup> Canadian Mental Health Association (CMHA), Toronto Branch  
28 Toronto Ontario, Canada  
29  
30  
31

32 Team gratefully acknowledge the clinical staff from the participating early intervention  
33 programs for their involvement in study recruitment. We also appreciate the contribution and  
34 support of the Toronto Early Intervention in Psychosis Network.  
35  
36  
37  
38  
39  
40  
41  
42  
43  
44  
45  
46  
47  
48  
49  
50  
51  
52  
53  
54  
55  
56  
57  
58  
59  
60

## References

1. Jablensky A, Sartorius N, Ernberg G et al. Schizophrenia: manifestations, incidence and course in different cultures. A World Health Organization ten-country study. *Psychol Med Monogr Suppl* 1992;20:1-97.
2. Government of Canada. The human face of mental health and mental illness in Canada. 2006. [http://www.phac-aspc.gc.ca/publicat/human-humain06/pdf/human\\_face\\_e.pdf](http://www.phac-aspc.gc.ca/publicat/human-humain06/pdf/human_face_e.pdf)
3. Health Canada. A Report on Mental Illnesses in Canada. 2002. [http://www.phac-aspc.gc.ca/publicat/miic-mmac/pdf/men\\_ill\\_e.pdf](http://www.phac-aspc.gc.ca/publicat/miic-mmac/pdf/men_ill_e.pdf)
4. Harvey SB, Dean K, Morgan C et al. Self-harm in first-episode psychosis. *Br J Psychiatry* 2008;192:178-184.
5. Pompili M, Serafini G, Innamorati M et al. Suicide risk in first episode psychosis: a selective review of the current literature. *Schizophr Res* 2011;129:1-11.
6. Dealberto MJ, Middlebro A, Farrell S. Symptoms of schizophrenia and psychosis according to foreign birth in a Canadian sample of homeless persons. *Psychiatr Serv* 2011;62:1187-1193.
7. Leff J, Sartorius N, Jablensky A, et al. The International Pilot Study of Schizophrenia: five-year follow-up findings. *Psychol Med* 1992;22: 131-145.
8. Liberman RP, Kopelowicz A. Recovery from schizophrenia: a concept in search of research. *Psychiatr Serv* 2005;56:735-742.
9. Cantor-Graae E, Selten JP. Schizophrenia and migration: a meta-analysis and review. *Am J Psychiatry* 2005;162:12-24.
10. Hjern A, Wicks S, Dalman C. Social adversity contributes to high morbidity in psychoses in immigrants—a national cohort study in two generations of Swedish residents. *Psychol Med* 2004;34:1025-33.
11. Wicks S, Hjern A, Gunnell D, et al. Social adversity in childhood and the risk of developing psychosis: a national cohort study. *Am J Psychiatry* 2005;162:1652-7.
12. Harrow M, Grossman LS, Jobe TH, et al. Do patients with schizophrenia ever show periods of recovery? A 15-year multi-follow-up study. *Schizophr Bull* 2005;31:723-734.

- 1  
2  
3  
4  
5  
6  
7  
8  
9  
10  
11  
12  
13  
14  
15  
16  
17  
18  
19  
20  
21  
22  
23  
24  
25  
26  
27  
28  
29  
30  
31  
32  
33  
34  
35  
36  
37  
38  
39  
40  
41  
42  
43  
44  
45  
46  
47  
48  
49  
50  
51  
52  
53  
54  
55  
56  
57  
58  
59  
60
13. Chorlton E, Mckenzie K, Morgan C, et al. Course and outcome of psychosis in black Caribbean populations and other ethnic groups living in the UK: A systematic review. *Int J Soc Psychiatry* 2012;58(4):400-408.
14. Mental Health Commission of Canada. *Changing Directions, Changing Lives: The Mental Health Strategy for Canada*. 2012.  
<http://strategy.mentalhealthcommission.ca/pdf/strategy-text-en.pdf>
15. Hansson E, Tuck A, Lurie S, and McKenzie, K, for the Task Group of the Services Systems Advisory Committee, Mental Health Commission of Canada. *Improving mental health services for immigrant, refugee, ethno-cultural and racialized groups: Issues and options for service improvement*. 2010.  
[http://www.mentalhealthcommission.ca/English/system/files/private/Diversity\\_Issues\\_Options\\_Report\\_ENG\\_0.pdf](http://www.mentalhealthcommission.ca/English/system/files/private/Diversity_Issues_Options_Report_ENG_0.pdf)
16. Archie S, Akhtar-Danesh N, Norman R, et al. Ethnic diversity and pathways to care for a first episode of psychosis in Ontario. *Schizophr Bull* 2010; 36:688-701.
17. Anderson K, Flora N, Ferrari M, et al. *Comparative Study of Pathways to First-Episode Care for Psychosis in Three Ethnic Groups in Ontario: The African, Caribbean, & European Project (ACE)* in press
18. Krueger R, Casey MA. *Focus group. A practical guide for applied research* 4th edition. 2009 Thousand Oaks, CA: Sage Publication.
19. Morse J. The significance of saturation. *Qualitative Health Research*. 1995; 5: 147-149.
20. Lincoln YS and Guba EG. *Naturalistic inquiry*. 1985; Newbury Park, CA: Sage.
21. Braun V and Clarke A. Using thematic analysis in psychology. *Qualitative research in psychology*. 2006; 3: 77-101.
22. Goffman E. *Stigma. Notes on the management of spoiled identity*. 1963; London, UK: Penguin Books.
23. Link BG and Phelan JC. Conceptualizing stigma. *Annual Review of Sociology*. 2001; 27:363-385.
24. Corrigan PW. Mental health stigma as social attribution: Implications for research methods and attitude change. *Clinical Psychology: Science and Practice*. 2000; 7:48-67.

- 1  
2  
3 25. Boydell KM, Gladstone BM, Volpe T. Understanding help seeking delay in the prodrome  
4 to first episode psychosis: a secondary analysis of the perspectives of young people.  
5 Psychiatr Rehabil J 2006; 30: 54–60.  
6  
7
- 8  
9 26. Judge AM, Estroff SE, Perkins DO, et al. Recognizing and responding to early psychosis: a  
10 qualitative analysis of individual narratives. Psychiatr Serv 2008; 59: 96–9.  
11
- 12  
13 27. Bergner E, Leiner AS, Carter T, et al. The period of untreated psychosis before treatment  
14 initiation: a qualitative study of family members' perspectives. Compr Psychiatry 2008;  
15 49: 530–6.  
16
- 17  
18 28. Corcoran C. Trajectory to a first episode of psychosis: a qualitative research study with  
19 families. Early Interv Psychiatry 2007; 1: 54–60.  
20
- 21  
22 29. Czuchta DM, McCay E. Help-seeking for parents of individuals experiencing a first  
23 episode of schizophrenia. Arch Psychiatr Nurs 2001; 15: 159–70.  
24
- 25  
26 30. Gladstone B, Volpe T, Boydell K. Issues encountered in a qualitative secondary analysis  
27 of help-seeking in the prodrome to psychosis. J Behav Health Serv Res 2007; 34: 431–  
28 42.  
29
- 30  
31 31. Monteiro B, dos Santos J, Martine D. Patients' relatives delayed help seeking after a first  
32 psychotic episode. Rev Bras Psiquiatr 2006; 28: 104–10.  
33
- 34  
35 32. Ritsher JB and Phelan JC. Internalized stigma predicts erosion of morale among  
36 psychiatric outpatients. Psychiatry research. 2004; 129:257–265.  
37
- 38  
39 33. Schulze B. Stigma and mental health professionals: A review of the evidence on an  
40 intricate relationship. International Review of Psychiatry. 2007; 19(2): 137–155.  
41
- 42  
43 34. Kirmayer LJ, Weinfeld M, Burgos G, et al. Use of health care services for psychological  
44 distress by immigrants in an urban multicultural milieu. Can J Psychiatry. 2007;52:295–  
45 304.  
46
- 47  
48 35. Whitley R, Kirmayer LJ, Groleau D. Understanding immigrants' reluctance to use mental  
49 health services: A qualitative study from Montreal. Can J Psychiatry. 2006;51:205–9  
50  
51  
52  
53  
54  
55  
56  
57  
58  
59  
60

**Table 1**

| Variable               | n  | (%)     |
|------------------------|----|---------|
| Sex                    |    |         |
| Male                   | 13 | (50.0)  |
| Female                 | 13 | (50.0)  |
| Education              |    |         |
| >High school           | 8  | (30.77) |
| ≤High school           | 18 | (69.23) |
| Born in Canada         |    |         |
| Yes                    | 18 | (69.23) |
| No                     | 8  | (30.77) |
| English Spoken at home |    |         |
| Yes                    | 18 | (69.23) |
| No                     | 6  | (23.08) |
| English and other      | 2  | (7.69)  |
| Relationship Status    |    |         |
| Single                 | 24 | (92.31) |
| Married                | 0  | (0.00)  |
| Cohabiting             | 1  | (3.85)  |
| Separated/Divorced     | 1  | (3.85)  |
| Sexual Orientation     |    |         |
| Heterosexual           | 22 | (84.62) |
| Homosexual             | 1  | (3.85)  |
| Bisexual               | 2  | (7.69)  |

|                        |    |         |
|------------------------|----|---------|
| Other                  | 1  | ( 3.85) |
| Parents Born in Canada |    |         |
| Both                   | 5  | (19.23) |
| Father Only            | 4  | (15.38) |
| Mother Only            | 2  | (7.69)  |
| Not born in Canada     | 15 | (57.69) |

**Table 2**

7. The sample size in this study was relatively small; only limited inferences can be drawn for other groups.
8. The sample size was defined from the quantitative part of the study. We were not able to involve any family members of African origin as our original pool of participants was very small.
9. There are many different ways to group people from different ethnic groups and races. Our classification was subjective, based on self-identification. At the same time, arbitrary choices were made for the analysis of the quantitative part of the study—focus groups were based on these decisions. We acknowledge that this did not necessarily reflect the fluidity of ethnic differences and diversity of identities represented by the participants.

**Table 3**

1. Universal and selected prevention interventions in school are needed:
  - Education in school settings,
  - Early detection efforts should focus on identifying the full spectrum of psychotic symptoms. As youth described, withdrawal, and, broadly, negative symptoms, often occur before the psychosis develops. However, those symptoms are often questioned and neglected by family members and health providers;
2. Anti-stigma initiatives are needed and should be developed through the lens of cultural knowledge of and beliefs about mental health problems;
3. Increased family involvement should be encouraged;



- 1
  - 2
  - 3
  - 4
  - 5
  - 6
  - 7
  - 8
  - 9
  - 10
  - 11
  - 12
  - 13
  - 14
  - 15
  - 16
  - 17
  - 18
  - 19
  - 20
  - 21
  - 22
  - 23
  - 24
  - 25
  - 26
  - 27
  - 28
  - 29
  - 30
  - 31
  - 32
  - 33
  - 34
  - 35
  - 36
  - 37
  - 38
  - 39
  - 40
  - 41
  - 42
  - 43
  - 44
  - 45
  - 46
  - 47
  - 48
  - 49
  - 50
  - 51
  - 52
  - 53
  - 54
  - 55
  - 56
  - 57
  - 58
  - 59
  - 60
4. Self-referral to early intervention services may be beneficial and the possibility for a triage model should be explored;
  5. Sensitivity training should be offered for general practitioners and emergency staff on recognition, mental illness/gender bias resources, and services;
  6. Sensitivity training should be offered for police and detention centre staff.

For peer review only

# BMJ Open

## The African, Caribbean, & European (ACE) Pathways to Care Study: A qualitative exploration of similarities and differences between African-, Caribbean-, and European-origin groups in pathways to care for psychosis.

|                                 |                                                                                                                                                                                                                                                                                                                                                                                                                                                                                                                                                                                                                                                                  |
|---------------------------------|------------------------------------------------------------------------------------------------------------------------------------------------------------------------------------------------------------------------------------------------------------------------------------------------------------------------------------------------------------------------------------------------------------------------------------------------------------------------------------------------------------------------------------------------------------------------------------------------------------------------------------------------------------------|
| Journal:                        | <i>BMJ Open</i>                                                                                                                                                                                                                                                                                                                                                                                                                                                                                                                                                                                                                                                  |
| Manuscript ID:                  | bmjopen-2014-006562.R1                                                                                                                                                                                                                                                                                                                                                                                                                                                                                                                                                                                                                                           |
| Article Type:                   | Research                                                                                                                                                                                                                                                                                                                                                                                                                                                                                                                                                                                                                                                         |
| Date Submitted by the Author:   | 12-Nov-2014                                                                                                                                                                                                                                                                                                                                                                                                                                                                                                                                                                                                                                                      |
| Complete List of Authors:       | Ferrari, Manuela; Centre for Addiction and Mental Health (CAMH), Social Aetiology of Mental Illness (SAMI) Training Program -CIHR Strategic Training; York University, School of Health Policy and Management<br>Flora, Nina; Centre for Addiction and Mental Health (CAMH),<br>Anderson, Kelly; Western University, Department of Epidemiology & Biostatistics<br>Tuck, Andrew; Centre for Addiction and Mental Health (CAMH),<br>Archie, Suzanne; McMaster University, Department of Psychiatry and Behavioural Neurosciences<br>Kidd, Sean; Centre for Addiction and Mental Health (CAMH),<br>McKenzie, Kwame; Centre for Addiction and Mental Health (CAMH), |
| <b>Primary Subject Heading</b>: | Mental health                                                                                                                                                                                                                                                                                                                                                                                                                                                                                                                                                                                                                                                    |
| Secondary Subject Heading:      | Qualitative research, Health services research                                                                                                                                                                                                                                                                                                                                                                                                                                                                                                                                                                                                                   |
| Keywords:                       | Schizophrenia & psychotic disorders < PSYCHIATRY, QUALITATIVE RESEARCH, Child & adolescent psychiatry < PSYCHIATRY                                                                                                                                                                                                                                                                                                                                                                                                                                                                                                                                               |
|                                 |                                                                                                                                                                                                                                                                                                                                                                                                                                                                                                                                                                                                                                                                  |

SCHOLARONE™  
Manuscripts

## Title

**The African, Caribbean, & European (ACE) Pathways to Care Study: A qualitative exploration of similarities and differences between African-, Caribbean-, and European-origin groups in pathways to care for psychosis.**

Manuela Ferrari,<sup>a</sup> Nina Flora,<sup>a</sup> Kelly K. Anderson,<sup>b</sup> Andrew Tuck,<sup>a</sup> Suzanne Archie,<sup>c</sup> Sean Kidd,<sup>a,d</sup> & Kwame McKenzie<sup>a,d</sup> on behalf of the ACE Project Team

<sup>a</sup>*Social and Epidemiological Research, Centre for Addiction and Mental Health (CAMH)*

*Toronto, Ontario, Canada*

<sup>b</sup>*Department of Epidemiology & Biostatistics, Western University, London, Ontario, Canada*

<sup>c</sup>*Department of Psychiatry and Behavioural Neurosciences, McMaster University*

*Hamilton, Ontario, Canada*

<sup>d</sup>*Department of Psychiatry, University of Toronto*

*Toronto, Ontario, Canada*

**Correspondence:**

Manuela Ferrari, PhD

Social and Epidemiological Research

Centre for Addiction and Mental Health (CAMH)

455 Spadina Avenue, Suite 300

Toronto, ON M5S 2G8 CANADA

Phone: (416)535-8501 ext. 77614 Fax: (416) 979-0564

E-mail: manuela.ferrari@camh.ca

Word count : 6,433

## Abstract

**Objectives:** This paper reports on a qualitative exploration of the reasons for differences in pathways to care and duration of untreated psychosis (DUP) in the African, Caribbean, and European (ACE) Pathways to Care Study from the perspective of respondents to the study and their families. The aim was to understand differences in DUP between African-, Caribbean-, and European-origin groups.

**Setting:** Ontario, Canada.

**Participants:** Thirty-four participants in total. Twenty-five young people who had experienced a first episode of psychosis and nine family members. Participants were part of the ACE Pathways to Care Study.

**Design:** We implemented six focus groups. Among the young people there was one male and one female European-origin group, a male African-origin group, a male Caribbean-origin group; for family-member, a European-origin group a Caribbean-origin group. Furthermore, we implemented four in-depth interviews with two young African-, one Caribbean-, one European-origin women with lived experience of psychosis.

**Results:** Factors that influenced help-seeking delays across the three groups were: personal awareness of symptoms, family members' knowledge of psychotic symptoms, and knowledge of mental health services. Youth and their family members described how stigma played a key role in pathways to care by stopping them from asking for help. The way in which stigma operated on the three groups' members, from feeling ashamed to feeling guilty for their mental illnesses, helped to explain differences in DUP between the groups. Guilt feelings emerged as a prominent theme among members from the African and Caribbean groups and it was not discussed in the European focus group. Delay in entering into first-episode psychosis (FEP) programs was also influenced by the stigma perceived by young people in health care settings. This had an impact on the therapeutic relationships, disclosure of symptoms, and overall trust in the health care system.

**Conclusions:** The findings of this paper suggest that stigma, especially internalized stigma, may operate in different ways in European-, African-, and Caribbean-origin groups. This could

1  
2  
3 explain the differences in the pathways to early intervention services for psychosis for these  
4 young people. These findings could inform the development of more equitable services for  
5 people in early stages of psychosis.  
6  
7  
8  
9

10  
11 **Keywords:** First-episode Psychosis; Pathways to Care; Duration of Untreated Psychosis; Stigma;  
12 Ethnicity.  
13

#### 14 **Key messages**

- 15 1. The findings suggest that stigma, especially internalized stigma in African-, and Caribbean-  
16 origin groups, seems to explain differences in pathways to care between the three groups.  
17
- 18 2. Delay in entering into first-episode psychosis programs was also influenced by the stigma  
19 perceived by young people in health care settings. This had an impact on the therapeutic  
20 relationships, disclosure of symptoms, and overall trust in the health care system.  
21
- 22 3. Findings from this study could be used anti-stigma initiatives and sensitivity training for  
23 key-players (e.g., general practitioners, emergency staff, police). Such initiatives should be  
24 developed through the lens of cultural knowledge of and beliefs about mental health  
25 problems.  
26  
27  
28  
29  
30  
31

#### 32 **Strengths and limitations of this study**

- 33 1. Use qualitative methodology to explore similarity and differences in pathways to care  
34 and DUP between African-, Caribbean-, and European-origin groups.  
35  
36
- 37 2. Young people who experienced a first episode of psychosis and their family members  
38 were invited to review ACE Study quantitative findings and elaborate on them.  
39  
40  
41
- 42 3. Young people and their family members were invited to comment on possible strategies  
43 and ideas about how the system of care could be improved  
44  
45  
46  
47  
48
- 49 4. The sample size in this study was relatively small; only limited inferences can be drawn  
50 for other groups.  
51  
52  
53  
54  
55  
56  
57  
58  
59  
60

- 1  
2  
3  
4  
5  
6  
7  
8  
9  
10  
11  
12  
13  
14  
15  
16  
17  
18  
19  
20  
21  
22  
23  
24  
25  
26  
27  
28  
29  
30  
31  
32  
33  
34  
35  
36  
37  
38  
39  
40  
41  
42  
43  
44  
45  
46  
47
5. The sample size was defined from the quantitative part of the study. We were not able to involve any family members of African origin as our original pool of participants was very small.

## Introduction

Psychotic disorders affect 1–2% of the population and are associated with a significantly shorter life expectancy and an increased risk of self-harm and violent victimization [1-8]. Members of immigrant groups have been reported to be at an increased risk of psychosis. A number of factors are considered to be contributory, such as social deprivation and disorganization, separation from parents, and the experience of discrimination [9-14]. The Canadian literature has reported differences in the use of services by members of immigrant groups [15,16]. There are barriers to getting care for many immigrant groups [15]. Both the Canadian and international literature have investigated differences in pathways to care and service use and outcomes for people of Caribbean and African origin with psychosis [13, 16]. A longer duration of untreated psychosis (DUP) and more coercive care pathways (e.g., compulsory admission, police and criminal justice system involvement before admission) have been reported in the African- and Caribbean-origin groups in Ontario [16]; both these factors are associated with poorer outcomes [12,13].

48  
49  
50  
51  
52  
53  
54  
55  
56  
57  
58  
59  
60

The African, Caribbean, and European (ACE) Pathways to Care Study investigated pathways to care and the duration of untreated psychosis (DUP) in African-, Caribbean-, and European-origin groups in Ontario, Canada. The study identified differences between the three groups in the pathways to first-episode psychosis (FEP) programs. The median DUP was seven

1  
2  
3 months for the European group, nine months for the African group, and 16 months for the  
4  
5 Caribbean group. Caribbean participants in the study had fewer health services/providers in  
6  
7 their pathways to care, they more often accessed FEP programs from an in-patient admission,  
8  
9 and they faced more obstacles in their access to specialized treatment for psychosis than the  
10  
11 European group. African group members in the study more often had an emergency  
12  
13 department as first contact in their pathways [17].  
14  
15

16  
17  
18 Once disparities have been identified, understanding of the reasons why they may exist  
19  
20 is necessary if we are to develop effective services. This paper reports a qualitative exploration  
21  
22 of the reasons for differences in pathways to care and DUP in the ACE Study from the  
23  
24 perspective of respondents to the study and their families. The aim was to understand  
25  
26 differences in DUP between African-, Caribbean-, and European-origin groups. To do so, we  
27  
28 explored young people's and their family members' journeys of seeking help for psychosis,  
29  
30 investigating how people responded to early signs of psychosis as well as the roles that  
31  
32 different people and services played in accessing specialized programs for psychosis.  
33  
34  
35  
36  
37  
38

## 39 **Methods**

40  
41  
42 This study used an inductive qualitative approach to examine differences in the routes  
43  
44 to care between young people with lived experience of psychosis of African-, Caribbean-, and  
45  
46 European-origin. In this exploratory and inductive qualitative study, the data analysis and  
47  
48 interpretation developed from patterns originated in empirical data rather than a deductive  
49  
50 process where an existing theory, or a hypothesis, guides the data analysis and interpretation  
51  
52  
53  
54  
55  
56  
57  
58  
59  
60 process.

1  
2  
3 Focus groups were used as a means of generating in-depth knowledge of pathways to  
4 care, exploring the interaction between individual socio-cultural positions, young people's  
5 experiences of seeking help, and group dynamics—as each participant's narrative is generated  
6 out of the journeys of others. By using focus groups we were able to examine how participants  
7  
8 (1) interacted with each other; (2) produced and reproduced knowledge; and (3) articulated  
9 and/or defended their views [18].  
10  
11  
12  
13  
14  
15  
16  
17  
18

### 19 *Ethical considerations*

20  
21 Ethics approval was obtained from the Research Ethics Board (REB) at the Centre for  
22 Addiction and Mental Health, as well as from the REB at each participating hospital site of the  
23 ACE Study. The approved REB consent form was reviewed at the beginning of each focus group  
24 and interview. The consent form emphasized costs and benefits of taking part in the study, its  
25 voluntary nature, and each participant's ability to his/her participation at any time.  
26 Confidentiality procedures and data management information were described within the  
27 consent form and reviewed before the beginning of each focus group and interview. During  
28 each focus group we informed focus group participants that, while we can promise that their identity  
29 will be kept confidential, we could not stop or prevent participants who were in the group from sharing  
30 things that should be confidential.  
31  
32  
33  
34  
35  
36  
37  
38  
39  
40  
41  
42  
43  
44  
45  
46

### 47 *Participant Recruitment*

48  
49 Our groups were based on the categories developed by the Toronto District School  
50 Board. Respondents were asked to choose which racial or ethnic group best reflected their  
51 identity (see Anderson et al. for more information) [17]. Participants who took part in the ACE  
52 Study's semi-structured interviews were asked if they were willing to be re-contacted. Only  
53  
54  
55  
56  
57  
58  
59  
60



1  
2  
3 those who agreed were approached for the qualitative study. They were asked if they would  
4 take part in a two-hour focus group to discuss the results of the study. Participants' family  
5 members were also contacted and asked if they were willing to take part in a separate focus  
6 group. One hundred and nine quantitative interview participants were contacted to take part in  
7 a focus group or an interview. Of these, 31 declined participation, 38 could not be reached, and  
8 40 agreed to take part in the focus group or an individual interview and, due to scheduling  
9 issues, only 25 of these individuals could attend a focus group or an interview.  
10  
11  
12  
13  
14  
15  
16  
17  
18  
19  
20  
21

22 Four focus groups with young people were implemented: one male group for each of  
23 the African-, Caribbean-, and European-origin groups as well as one female European-origin  
24 groups (African = 3 male, Caribbean = 3 male, European= 7 male and women 8 male). Two focus  
25 groups were organized for the family members, one for each of the Caribbean, and European  
26 groups (European = 6, Caribbean = 3). Because of difficulty recruiting for the African and  
27 Caribbean women's groups, we adjusted the study protocol and undertook individual in-depth  
28 interviews, for total of two interviews with African women, and one interview with a Caribbean  
29 woman with lived experience of psychosis. The protocol change allowed us to have a small, but  
30 important, representation of women from these two groups. Furthermore, we were able to  
31 conduct an interview with a young woman of European origin who, due to anxiety problems,  
32 did not feel comfortable attending the focus group session.  
33  
34  
35  
36  
37  
38  
39  
40  
41  
42  
43  
44  
45  
46  
47  
48  
49

#### 50 *Data collection*

51  
52

53 Focus groups were conducted by the first author, MF, who acted as focus group  
54 moderator, and research assistants who were trained in focus groups, transcribing, and  
55  
56  
57  
58  
59  
60

1  
2  
3 qualitative data analysis for the purpose of this study. Focus group questions were designed to  
4  
5 be conversational, open, and clear. They unfolded according to Krueger and Casey's  
6  
7 recommendations [18]: opening, introductory, key, ending (see Table 1). At the end of each  
8  
9 focus group, the research team involved in the focus group completed 30–40 minutes of  
10  
11 debriefing. During the focus groups, participants were presented with preliminary ACE Study  
12  
13 quantitative data; we focused on the differences in DUP as well as pathways to care and asked  
14  
15 participants to comment on them.  
16  
17  
18  
19

20  
21 Focus groups and in-depth interviews were digitally recorded. The digital audio files  
22  
23 were transcribed by the research assistants and reviewed for data accuracy. One research  
24  
25 assistant transcribed a focus group recording and the other reviewed the work done. Finally, all  
26  
27 material was also reviewed by MF. Focus group transcripts were then prepared to facilitate  
28  
29 thematic analysis. All participant names were changed to pseudonyms to ensure confidentiality.  
30  
31  
32  
33

34  
35 Traditional data saturation, that is, “collecting data until no new information is  
36  
37 obtained,” [19, p. 147] is often an object of controversy in qualitative research literature [19].  
38  
39 As Morse described: “The *quantity* of the data in a category is not theoretically important to the  
40  
41 process of saturation. Richness of the data is driven from detailed description, not the number  
42  
43 of time something is stated. Frequency counts are out” [19, p. 148]. We used instead Morse's  
44  
45 criterion of data saturation as “adequacy” of the data, which can be obtained through specific  
46  
47 methodological choices. These methodological choices were (a) selecting and working with an  
48  
49 ethnic- and gender-cohesive sample; (b) at the same time, working with three different  
50  
51 ethnocultural groups so as to maximize and explore cultural contrasts in pathways to care—a  
52  
53  
54  
55  
56  
57  
58  
59  
60

1  
2  
3 gap in current literature; and (c) basing our sample on quantitative data analysis, which allowed  
4  
5 focus-group-member checks on the quantitative findings, as well as the possibility for rich, full,  
6  
7 and complete understanding.  
8  
9

### 10 11 12 13 14 15 *Analysis*

16  
17  
18 Thematic analysis was employed to identify, analyze, and report patterns or themes  
19  
20 within data [20]. Our thematic analysis was data driven, rather than theoretically driven,  
21  
22 making use of an inductive approach, as the themes identified were strongly linked to the data  
23  
24 themselves. We followed Braun and Clark's steps of thematic analysis [21] by: (1) familiarizing  
25  
26 ourselves with our data (transcribing data, reviewing transcriptions for accuracy, reading  
27  
28 transcriptions over and over, and noting initial ideas); (2) generating initial codes and searching  
29  
30 for themes (collating codes into potential themes); (3) reviewing and redefining themes  
31  
32 (exploring how strong the identified themes are by assisting the relationship between first  
33  
34 [code] and second [theme] level of analysis, generating a thematic map of the analysis); and (4)  
35  
36 further unpacking the analysis through the writing process (identifying themes and initial  
37  
38 stigma concepts was further explored through a review of existing models of mental health  
39  
40 stigma).  
41  
42  
43  
44  
45  
46  
47

48  
49 We compared each participant's journey to care (shared during the focus group), the  
50  
51 pathway depicted during a semi-structured interview, and the participant's medical chart.  
52  
53 Further, we performed an analysis within each ethnic group, comparing and contrasting young  
54  
55 people's narratives with those of family members, and a cross-ethnic-group analysis. As a  
56  
57  
58  
59  
60

1  
2  
3 result, in the study findings we describe themes that were common across all the narratives as  
4  
5 well as the ones that were different between the three ethnic groups. All young people's and  
6  
7 family members' names used in this paper have been changed to ensure participants'  
8  
9 confidentiality.  
10

### 11 12 13 *Rigour*

14  
15  
16  
17 Lincoln and Guba [20] defined primary criteria to assess rigour and trustworthiness of  
18  
19 the qualitative research process. Primary criteria—credibility, authenticity, criticality, and  
20  
21 integrity—are necessary to all qualitative enquiry but they are insufficient in and of themselves.  
22  
23 Trustworthiness was achieved within the study through the following criteria: *credibility* and  
24  
25 *authenticity*, attained through multiple sources of data (e.g., pathways maps generated from  
26  
27 semi-structured interviews, chart reviews, focus groups' data) as well as specific and different  
28  
29 sample strategies being employed to generate rich and meaningful data; *criticality* and  
30  
31 *integrity*, using team debriefing and analysis to ensure methodological effectiveness.  
32  
33  
34  
35  
36

### 37 38 **Results**

#### 39 40 *Overview of the sample*

41  
42  
43 A total of 34 people took part in the study; 25 young people with lived experiences of  
44  
45 psychosis (origins: European = 16, African = 5, Caribbean = 4) and nine family members (origins:  
46  
47 European = 6, African = 0, Caribbean = 3). Table 2 reports the socio-demographic information  
48  
49 for young people with lived experiences of psychosis only—no socio-demographic information  
50  
51 was collected for family members at the time of the focus group.  
52  
53  
54

55  
56 Findings are presented in two main sections: (1) *Understanding help seeking*, in which  
57  
58  
59  
60

1  
2  
3 we first present commonality across the three groups, and then we investigate differences in  
4  
5  
6 DUP between African-, Caribbean-, and European-origin groups. In this section we unpack the  
7  
8 role of stigma and how it operates early on in pathways to care. In this paper, stigma refers to a  
9  
10 collection of negative attitudes, beliefs about, and behaviours directed at people with mental  
11  
12 disorders, which are manifested in rejection and avoidance of, and prejudice and discrimination  
13  
14 against people with mental illness conditions [22-24]. Stigma can be a barrier for people who  
15  
16 experience mental health problems by making them reluctant to ask for help due to fear of  
17  
18 prejudice, being labelled, and discrimination by others. Internalized stigma, or self-stigma,  
19  
20 occurs when a person takes on those negative stereotypes and assumptions and applies them  
21  
22 to themselves [23, 24]. Discrimination due to mental health stigma can take place in different  
23  
24 circumstances/settings: education, employment, housing, and treatment. (2) *Understanding*  
25  
26 *delay in entering first-episode psychosis (FEP) programs*, in which we explore the relationship  
27  
28 between negative experiences, stigma, health care delivery, and illness/symptoms disclosure.  
29  
30 The themes presented in this section are also common across the three groups.  
31  
32  
33  
34  
35  
36  
37  
38  
39  
40  
41  
42

### *Understanding help seeking*

#### Common across the three groups: Knowledge, awareness, and mental health stigma

45 Consistent across all narratives, for both young people and family members, was that  
46  
47 knowledge or lack of knowledge about symptoms of psychosis, mental illness, and services  
48  
49 available to them was key to them recognizing the significance of changes in behaviour. Often  
50  
51 this knowledge was based on family members' or friends' past experiences of mental illness.  
52  
53  
54  
55  
56  
57  
58  
59  
60

1  
2  
3 Maria: The one person who really helped me to realize what I'm going through, and that I  
4 need help, is my mother. She knows what I'm going through because she went through it  
5 with my father. She helps me a lot. ...  
6  
7

8 (European youth focus group)  
9  
10

11  
12 Young people who did not have any knowledge of signs or symptoms of psychosis were  
13 aware of personal changes but did not know that they were indicative of mental illness. In  
14 these cases, family members played a key role in the help-seeking process by taking them to  
15 the hospital.  
16  
17  
18  
19  
20  
21

22  
23 Benjamin: I was schizophrenic, and I didn't know what to do. I heard voices and stuff. I did  
24 some stuff that I couldn't remember, so some people took me in ...  
25

26 Paul: I kept hearing ... weird voices, but I didn't know what is. So, later on I came ... my  
27 parents took me to the hospital ...  
28

29 (African youth focus group)  
30  
31

32 Steve: I didn't know that I needed help. I had no one around me who knew what was  
33 happening. ... I was staying with a friend, my mom was occasionally stopping by ... she saw  
34 certain signs in me, and she immediately drove me to [name of the hospital].  
35

36 (Caribbean youth focus group)  
37  
38

39 June: I wouldn't have stayed in the emergency room, I wouldn't have gone by myself ... I  
40 didn't know what was going on. ... I didn't know *I was going crazy*, ... I thought everybody  
41 was against me.  
42

43 (European youth focus group)  
44  
45  
46

47 Young people and family members who did not have awareness or knowledge of the signs or  
48 symptoms of psychosis, struggled the most to understand and/or make sense of the situations.  
49  
50  
51

52  
53 Janine: I didn't know what this illness was. I thought it was just some kind of behaviours,  
54 being angry or strange like teenagers could possibly experience sometime ... it was people  
55 from the outside who used to tell me "No, this more than just ... you know teenager's  
56 crisis." Not knowing [the] symptoms ... I just didn't know what was going on really.  
57  
58  
59  
60

1  
2  
3 (Caribbean family members' focus group)  
4  
5  
6  
7

8 Louise: My son was 17 when he had his psychotic break. I thought he was just being a  
9 typical rebellious teenager ... he smoked pot. He didn't get violent. He was so scared and I  
10 didn't know what else to do with him. I took him to [name of general hospital] ... after  
11 about 15 hours convincing them that I was not taking him home, they admitted him.  
12

13 (European family members' focus group)  
14  
15  
16  
17

18 Often, family members attributed the changes in their relatives' behaviours to growing  
19 up/going through adolescence, peer groups/wrong crowds, stress, and/or substance abuse in  
20 young adults. Family members often thought that what their relatives were experiencing was  
21 just a temporary phase in their relatives' lives without recognizing signs or symptoms of  
22 psychosis. Help seeking often occurred after doubting the early signs of psychosis and, most  
23 importantly, after feeling sadness and discomfort.  
24  
25  
26  
27  
28  
29  
30  
31  
32

33 Along with knowledge and awareness of signs or symptoms of psychosis, the role that  
34 stigma played during the help-seeking process was also constantly present in the narratives.  
35  
36 Through the analysis conducted, it was possible to identify how individual and family  
37 perceptions of mental illness influenced the internalization of stigma. For example, young  
38 people involved in the study often distinguished between their rational understandings of the  
39 mental health problems, symptoms, and causes, and, at the same time, their feelings of being  
40 trapped in emotions such as shame.  
41  
42  
43  
44  
45  
46  
47  
48  
49  
50

51 Karen: People are scared to look for help, and to ...  
52

53 Maria: And to admit to themselves even ... [Karen: Yeah!] that "I have schizophrenia"... I  
54 never told anybody.  
55  
56

57 June: I'm still ashamed of what I have.  
58  
59  
60

1  
2  
3 Samantha: Me too.

4  
5 (European youth focus group)  
6  
7  
8

9  
10 Participants described how, for fear of family members' and/or friends' reactions to their  
11 conditions, they tried to ignore the signs and symptoms by, for example, using marijuana, and  
12 attempted to hide their symptoms from others.  
13  
14

15  
16 Sandi: I was worried about what people around me might say ... once you're in the  
17 hospital you can't really keep your secret anymore. There is a huge stigma about mental  
18 illness; people tend to like to avoid it.  
19

20  
21 (European youth focus group)  
22  
23

24  
25  
26 Positive symptoms (e.g., hearing voices, bizarre behaviour, violence) were often  
27 catalysts to treatment initiation. Family members often struggled to recognize when their  
28 relative was no longer able to care for himself/herself or when he/she was asking for help as  
29 the symptoms of psychosis took over his/her ability to make decisions. This created quite a  
30 complex situation where family members felt threatened or worried about their safety and, at  
31 the same time, guilty when they had to call the emergency department, ambulance, or,  
32 unfortunately, the police. This was evident in family members' narratives.  
33  
34  
35  
36  
37  
38  
39  
40  
41  
42

43  
44 Natali: I have been there ... I couldn't stop crying for days ... when my daughter finally  
45 broke down at school ... being scary violent with us. ... the first time she finally did get to  
46 the hospital that day [name of the hospital] ... It was almost like a relief, she was safe and  
47 she was away from us ... because we were scared. We were so afraid. [Sarah:  
48 (overlapping) Yes. Yes. Yeah.]  
49

50  
51 (European family members' focus group)  
52  
53  
54

55  
56 Stigma was also closely connected to how much the person who experienced psychosis was  
57 considered responsible for his/her mental condition or was in control, or not, of his/her  
58  
59  
60



1  
2  
3 symptoms. Family members recognized that mental illness is not perceived the same as other  
4 health problems. Physical disorders, such as cancer, generate compassion in extended family  
5 members, whereas mental disorders bring reactions of distancing, blaming, and stigmatizing  
6 from members of the extended family.  
7  
8  
9

10  
11  
12 Natali: Unfortunately, I still see ... my family members not so supportive. On the surface,  
13 they are, but I see them shy away from my son. I see the stigma, it is still so much there. If  
14 he was (clears throat) you know physically ill they would be right there.  
15

16 (European family members' focus group)  
17  
18  
19

20  
21 Overall, family members described how psychosis is hidden until it manifests through a  
22 person's behaviours. It is difficult to understand what is happening to the person as well as to  
23 assess if, when, and how to intervene.  
24  
25  
26  
27  
28

29 Differences in help seeking between the three groups: Internalized stigma as feeling shame  
30 versus feeling guilty for their own condition  
31  
32  
33

34  
35 Participants of European origin internalized mental health stigma as shame about their  
36 symptoms (e.g., hearing voices, unpredictable or bizarre behaviours in front of family and  
37 friends, or irrational actions). They felt distress caused by the awareness of their past bizarre  
38 behaviours and a sense of humiliation for their conditions. In contrast, young people from  
39 African- and, even more, Caribbean-origin groups stressed their responsibility for their  
40 conditions, they felt that they had done something wrong (for having an mental illness), and  
41 they felt a sense of failure for not being able to "snap out of it"—as a participant described  
42 during a focus group. In this sense, they seemed to internalize mental health stigma as guilt—  
43 there is shame and humiliation but also they felt that they had done something wrong.  
44  
45  
46  
47  
48  
49  
50  
51  
52  
53  
54  
55  
56  
57  
58  
59  
60

1  
2  
3 Paul: ... there was a lot of pressure to excel in school and succeed. I dabbled too much in,  
4 dabbled too much in drugs, that was my problem ... that was really my fault. I have no  
5 one else to blame but myself ... people expect you to just walk it off kind of thing. But you  
6 really, you really can't, you can't really walk off a mental illness ... you can cope with it.  
7  
8

9 (African youth focus group)  
10

11 Steve: Going through a mental illness totally flipped the way I view ... everything! It's also  
12 made me become more aware of how family members react, and why are they reacting  
13 that way. Eventually it is what got me onto the culture of it, my religion, and so forth. I  
14 can't say exactly what it is about the Caribbean culture ... but, I can tell, those two things  
15 definitely play a factor in it.  
16  
17

18 (Caribbean youth focus group)  
19  
20

21  
22 In the African and Caribbean focus groups, participants discussed the role that religion  
23 had in shaping their and their families' perceptions of mental illness and feelings of guilt for  
24 their condition—this topic was not discussed in the European focus groups. In some cases,  
25 people described how they grew up thinking that mental illness was a sin or God's punishment.  
26 Although they did not think in this way now, they saw how this perception influenced their  
27 understanding of early signs of psychosis, the focuses of their paranoid symptoms (in some  
28 cases), and, most importantly, their asking for help.  
29  
30  
31  
32  
33  
34  
35  
36  
37  
38  
39  
40

41 Suzanne: Well, it made me feel badly because I thought, "Wow. You know, she's so  
42 nervous [mother] about me going to the hospital for help." It made me feel kind of  
43 ashamed that I needed help. ... I guess it made me a little bit reluctant to seek care later  
44 on. [Later on in the interview] ... in the beginning my mom was like, "Suzanne you need to  
45 PRAY more. That's the problem." And, I'm like, "No mom, I need medication. I need some  
46 help." ... Sometimes I just tell her that I prayed just so she can get off my case. My brother  
47 often tell me that my life has gone in this direction because I stopped going to church. ... It  
48 makes me feel bad. It's not helpful me to get better.  
49  
50

51 (Caribbean youth interview)  
52  
53  
54  
55

56 Greg: I can't say everybody but, A LOT of people in my family, and in the community ...  
57 they become very superstitious. It's a mind job with Catholicism first of all—and no  
58  
59  
60

1  
2  
3 offense to anybody here who's Catholic, I am Catholic. Something simple as, as having a  
4 mental condition, is not simple in this world anymore, it becomes then, "that person  
5 needs to be exorcised, or that person's got bad demons—"  
6  
7

8 Steve: (overlapping) Oh, I've heard ... I've heard that, I've heard that, to get rid of my  
9 voices I have to get an exorcism.  
10

11 Greg: Yeah.  
12

13 Steve: That's what I heard from a friend.  
14

15 Greg: Like, my mom said that when she was uh, a kid, when she was like 5 or 6, she  
16 actually witnessed someone getting exorcised, because of voices in his head and stuff like  
17 that.  
18  
19

20 (Caribbean youth focus group)  
21  
22  
23  
24

25 As described, African- and, even more, Caribbean-origin young people reported that their  
26 mental illnesses were taboos among members of their close or extended families. While young  
27 people of African origin had their families around to support their struggles, young people of  
28 Caribbean origin who attended the focus groups had no one or only a few close family  
29 members. The support networks that could assist them in seeking help were not available.  
30  
31  
32  
33  
34  
35  
36  
37

38 Simone: When people in the Caribbean get to know that your child has this issue [mental  
39 illness] ... the whole family is labelled ... from the grandparent right the way down. The  
40 family is labelled and you are sort of ostracized. That's why many of us don't want to  
41 bring it up to the light ... we are in denial that this is not happening to this family. ... We,  
42 as parents, don't have the freedom to talk about it ... because of the stigma that's still  
43 attached ... we internalize it. When we internalize, we're stressed. We would love to know  
44 that there is somewhere that we can go and sit down and talk. We need to unload but we  
45 have no place to unload.  
46  
47  
48

49 (Caribbean family members' focus group)  
50  
51  
52  
53

54 African- and Caribbean-origin participants described how when they experienced early  
55 signs of psychosis, they tried to control them and they felt guilty if they were not able to. Their  
56 sense of guilt was also connected with cultural interpretation of mental illness as sin, God's  
57  
58  
59  
60

1  
2  
3 punishment, and a taboo illness heavily stigmatized—themes more present in the Caribbean-  
4 origin focus group and interviews.  
5  
6

7  
8 *Understanding delay in entering first-episode psychosis programs (FEP)*  
9

10  
11 Rachel: Now none of these people [university psychological service/psychiatrist] told me  
12 about any other resources. ... All I knew was [name of mental health hospital], which was,  
13 like, the last resort. ... I was in the dark. And then I went to my family doctor, and she was  
14 the first person after like 3 months who told us that, “Oh, there’s actually an in-patient  
15 program at [name of a general hospital], for if you’re in an emergency—go there.” ... So  
16 then when I got really bad, I was in the in-patient at [name of a general hospital] and  
17 there, it was when I actually found out about a bunch of other resources ...”  
18  
19

20  
21 (European youth focus group)  
22  
23

24  
25 Participants often recognized changes in behaviours and thinking but they did not always  
26 attribute these to a mental illness; however they were active in seeking help, contacting  
27 community services (e.g., school or university health services) or their family doctors, if they  
28 had one. In reflecting on their pathways, they often felt upset, as early attempts to ask for help  
29 were dismissed by providers and/or information was not provided to them.  
30  
31  
32  
33  
34

35  
36  
37 Negative experiences, stigma and care: First contact, therapeutic relationship, and disclosure of  
38  
39 symptoms  
40  
41

42  
43 Once in the system, groups’ differences in the journeys to specialized treatment seemed  
44 less present. Before entering into early intervention programs, young people saw between four  
45 and six difference health providers/services (e.g., family doctor, emergency, police, detention  
46 centre, in-patient unit). As young people described, the care they received (or did not receive)  
47 and health care providers’ attitudes towards mental illness influenced what they shared about  
48 their mental states (e.g., hearing voices, suicidal thoughts) and, overall, their trust in the  
49  
50  
51  
52  
53  
54  
55  
56  
57  
58  
59  
60

1  
2  
3 system. From the first contact with a hospital, the majority of young people involved in the  
4  
5 focus groups reported that, if it was a negative experience, it affected their therapeutic  
6  
7 relationships, and, generally, their willingness to stay in the system and to return, if needed, a  
8  
9 second time.  
10

14 Samantha: From my experience there's a lot of stigma and shame surrounding people  
15 who have substance abuse problems. Whenever I've been in treatment, there has not  
16 been an accepting atmosphere for me to discuss my issues or to make me feel like I'm  
17 actually going to get help.  
18

19  
20 (European youth focus group)  
21  
22  
23

24 Steve: Well, I found, like, a number of them [mental health care providers] definitely  
25 helped. I feel that the majority of [hospital name] staff definitely does have that, but  
26 there are still the ones that can create that negative experience for you when you're  
27 already going through a negative experience. ... It's funny ... you're going through stuff,  
28 even though your mind's not in the right place, you still remember all the negativity. ...  
29 [Andy: (overlapping) Yeah.] Yeah. Those are the things that I will always remember, about  
30 [name of the hospital] and dealing with [the staff] at the first time. Like, although they  
31 were there to help me, it didn't seem like half had actually studied mental health at all.  
32  
33  
34

35 (Caribbean youth focus group)  
36  
37  
38  
39

40 During the focus groups and interviews, participants reported how their experiences of  
41 poor quality of care was due to health providers' negative attitudes and behaviours towards  
42 mental illness. Indeed, stigma does operate, albeit marginally, in mental health services, such as  
43 primary care (e.g., family doctors), emergency departments, in-patient units, out-patient units,  
44 and so on and, when present, it seems to be more hurtful than when experienced outside the  
45 health care system.  
46  
47  
48  
49  
50  
51  
52  
53  
54  
55  
56

57 Eight young people who took part in the focus groups had police and detention centres  
58  
59  
60

1  
2  
3 as early contacts in their pathways to FEP treatment. Overall, police officers were perceived to  
4  
5  
6 be supportive, helpful, and understanding of the situations. Police officers have the duty to  
7  
8  
9 respond to an emergency call, accompany the person to the hospital emergency room, and stay  
10  
11 with them until the hospital staff takes over.  
12

13  
14 Linda: I did it twice. The first time, I went to the hospital was in an ambulance, and, the  
15  
16 second time was ... in a police car. I actually found the police were nice. Like, I was in  
17  
18 handcuffs [laughter], but I found them to be really nice ... they stayed with me until the  
19  
20 doctors started seeing me. They didn't judge me, and I asked the one cop if he was  
21  
22 married ... he was like showing me pictures of his kids. He was just nice.

23  
24 (European youth focus group)  
25  
26

27 Three men of European origin had forensic services in their pathways. In these cases, the young  
28  
29 men had to stay in detention for several days before they were able to see a judge. During the  
30  
31 focus groups they described how they were exposed to verbal and physical violence as well as  
32  
33 the trauma of experiencing psychotic episodes while in detention.  
34  
35  
36

37  
38 Rob: Well, for me the cops were ok. But, then at the detention centre, I said something  
39  
40 really dumb to the correctional officer and ... I'm walking ... he literally just POUNDS me,  
41  
42 he beat the shit out of me. Right there on the ground. I wasn't shaken by it at all because I  
43  
44 was psychotic, but like—I don't know, it was really weird. He literally took me from  
45  
46 behind and just pounded me. I guess his superior comes in and takes him off me. I guess  
47  
48 the cops are ok but the guys in the jail ...  
49

50  
51 Matt: Yeah, I had the same experience. One time, when I was psychotic, my mom called  
52  
53 the police on me ... She meant for me to go to the hospital but I got charged by the police  
54  
55 with a bunch of things. They sent me to JAIL, and I was completely psychotic ... they didn't  
56  
57 know what to do with me. They were physical with me, they injected me in the back of  
58  
59 my neck with I don't know what medication. They just locked me in a jail cell for probably  
60  
61 a month until I was transferred to a medical facility.

62  
63 (European youth focus group)  
64  
65  
66  
67  
68  
69  
70

1  
2  
3 It was interesting to notice that men of European origin were able to share these experiences  
4  
5 during the focus group, whereas men of African and Caribbean origin just mentioned police  
6  
7 involvement in their pathways without elaborating on it. We realized the sensitivity of this topic  
8  
9 which, combined with the sense of guilt, probably precluded any further disclosure.  
10  
11  
12  
13

14 In total, 10 youth had family doctors as first contact in their pathways. Among all focus  
15  
16 groups, there was only one case in which referral was made to an FEP program directly by a  
17  
18 general practitioner. The majority of them reported to have been misdiagnosed or had their  
19  
20 symptoms dismissed by their family doctors.  
21  
22  
23  
24

25 Benjamin: ... the family doctor doesn't, uh well, didn't work for me, he thought it was just  
26  
27 anxiety, like ... anxiety because of school ... 'cause I was going into university.

28  
29 (African youth focus group)  
30  
31  
32

33 In other cases, a young man and woman described how their family doctors focused only on  
34  
35 their substance abuse problems and reprimanded them for their behaviours.  
36  
37  
38

39 Steve: I kind of did [went to see my family doctor at first], but, he turned me down flatly,  
40  
41 'cause I was smoking weed. I said, "I thinking, I'm suffering with depression." He asked me  
42  
43 if I did drugs, I said that I did smoke weed quite often, and he said stop smoking the weed  
44  
45 then "come back and I help you." I never heard about it after that. Next time, I saw him, I  
46  
47 had to tell him that, yeah, I was diagnosed with schizophrenia. So, my general  
48  
49 practitioner, unfortunately, wasn't able to do anything at the time.

50  
51 (Caribbean youth focus group)  
52  
53  
54

55 Jill: I recognized the symptoms but I didn't know the specifics of my diagnosis. I went to  
56  
57 the family doctor and explained that I felt that I was being followed and everything. And  
58  
59 then he told me, "Okay. You need to stop doing drugs," 'cause I was high on marijuana  
60  
61 when it first happened ... but [it happened] several time [before] and I just thought it was  
62  
63 the pot.

64  
65 (African youth interview)  
66  
67  
68  
69  
70

1  
2  
3  
4  
5  
6 It may be difficult for general practitioners to diagnose psychosis early; however, participants  
7  
8 felt that they had actively sought help but their requests were misunderstood or dismissed.  
9

10  
11 When admitted to emergency units or in-patient services, participants described the  
12  
13 following negative experiences: being labelled, feeling like a number, feeling no longer a person  
14  
15 but an illness, being judged for behaviours/symptoms, and/or being treated like a child.  
16  
17  
18  
19

20 Matt: I don't know, how it makes sense, but [hospital staff] were almost like TOO nice ... I  
21 don't know the word, like, treating you like you're a child ... talking down to you. It was  
22 NICE, but it didn't make me feel better ... other people were nice but, at the same time ...  
23 made you feel like an equal. I felt like that was important.  
24

25  
26 Steve: I think maybe the word you were looking for was "pity." Like we were treated with  
27 PITY [Matt: Yeah.] Yeah. I think that, people think that people with schizophrenia are  
28 somehow STUPIDER or something ... I don't think people with schizophrenia are stupid at  
29 all.  
30

31 (European youth focus group)  
32

33  
34 Robin: They treat you like a number [mumbles of agreement].  
35

36 Samantha: When I went to the hospital last time ... I was going through a panic attack  
37 when I FIRST found out I had schizophrenia, and they, the nurse was like, "Yeah, you're  
38 just faking it, you're perfectly fine, nothing's wrong with you."  
39

40 Robin: Yeah.  
41

42 Samantha: It really, made me not like being in the hospital. I did not want to go back  
43 there ever.  
44

45  
46 Natali: I agree. I think they treat you more like a number. And I think, being treated like  
47 a PERSON instead of a number or a case because, if you're just a case, you're like "I'm  
48 schizophrenic" ... you're not a person, anymore [mumbles of agreement].  
49

50 (European youth focus group)  
51  
52  
53  
54  
55

56 According to young people, all of these factors influenced the therapeutic relationship  
57  
58  
59  
60



1  
2  
3 with services and providers and, in particular, affected young people's disclosures of  
4  
5 symptoms—as described.  
6  
7

## 8 9 **Discussion**

10  
11  
12 Differences in pathways to care and the duration of untreated psychosis have been  
13 reported in some studies of ethnic minority groups [13, 16]. The reasons for these differences  
14 are unclear [25]. In this paper, the authors focused on participants' narrative accounts to  
15 investigate the social and cultural contexts of help seeking. In doing so, we were able to further  
16 investigate differences between the groups as well as how a number of factors, including  
17 stigma, influenced both help seeking and access to specialized programs. We developed  
18 preliminary hypotheses about the link between internalized stigma, cultural beliefs about  
19 mental illness, and help seeking. At the same time, we discussed how interactions with health  
20 care settings shape the experience of asking for help, influencing future engagement with  
21 health providers and/or willingness to disclose symptoms.  
22  
23  
24  
25  
26  
27  
28  
29  
30  
31  
32  
33  
34  
35  
36  
37

38 In our attempt to understand differences in the pathways to care and DUP between  
39 African-, Caribbean-, and European-origin groups, we found similarities to other studies that  
40 broadly explore help seeking among young people in FEP programs [26, 27] and their families  
41 [28-33] without focusing on ethnicity. As with our findings, other qualitative works described  
42 long and difficult periods from the realization of signs and symptoms of psychosis to the  
43 initiation of help seeking [28-31]. As other studies reported, family members described how the  
44 role of caregiver was emotionally draining [32] due to their inability to understand and cope  
45 with the changes in their family members, feelings of guilt after calling the police, as well as  
46  
47  
48  
49  
50  
51  
52  
53  
54  
55  
56  
57  
58  
59  
60

1  
2  
3 frustration of their inability to navigate the health care system and/or lack of involvement in  
4  
5 the treatment program [33]. Family members' knowledge of mental illness and services  
6  
7 available to them was important in dealing with the situations. However, as other studies  
8  
9 described, they often mistook early signs of psychosis—especially in the prodromal phase of  
10  
11 the illness—for mood changes due to adolescence, social withdrawal, stress, or drugs [26-30].  
12  
13 At the same time, even if the young people who took part in our study recognized changes in  
14  
15 themselves, they did not attribute these changes to mental illness—as was also described in  
16  
17 other studies [26, 30]. Moreover, as we discussed, because of the associated stigma, young  
18  
19 people and family members engaged in denial, avoidance, and hiding of early symptoms of  
20  
21 psychosis which prevented them from seeking help [26-34].  
22  
23  
24  
25  
26  
27  
28

29 In *Stigma*, Goffman [22] defined and discussed stigma as *discredited* versus  
30  
31 *discreditable*; in the first case, a visible and physical mark defines stigma, where, in the second,  
32  
33 no visible or physical mark is present—as is the case with the stigma of mental illness. More  
34  
35 recently, further theories have been developed and used to understand the relationship  
36  
37 between stigma and mental illness (see Link & Phelan [23], and Corrigan [24]). In all of these  
38  
39 theories, stigma is based on signs that define who is different, stereotypes about the person or  
40  
41 group, marginalization, avoidance, discrimination, fear of what or who is different—where  
42  
43 normality and abnormality or similarity and difference are defined by socio-cultural norms and  
44  
45 beliefs. Furthermore, internalized stigma seems more distractive and harmful to the affected  
46  
47 person's health and, broadly, to his/her sense of self [35].  
48  
49  
50  
51  
52  
53

54 Several studies investigate stigma and mental illness [33, 35, 36]. Stigma about mental  
55  
56 illness is prevalent in the general public but, unfortunately, occurs in health and mental health  
57  
58  
59  
60

1  
2  
3 settings as well [36]. Work done in the Canadian context recognizes the role of stigma in  
4  
5 seeking help for mental illness in immigrant and refugee groups in Canada. The *Improving*  
6  
7 *mental health services for immigrant, refugee, ethno-cultural and racialized groups: Issues and*  
8  
9 *options for service development* report describes how immigrants, refugees, and racialized  
10  
11 groups are less likely to ask about mental health systems because of possible stigma and this  
12  
13 leads either to people not getting treatment or to a delay in getting treatment [15]. Other  
14  
15 studies describe the specific needs and issues that immigrant groups are facing in relation to  
16  
17 mental health services in urban settings in Canada [37, 38]. These studies, which were  
18  
19 conducted with West Indian immigrants in Montreal, focus on cultural beliefs in non-medical  
20  
21 interventions as the preferred form of treatment for mental illness (e.g., prayer or traditional  
22  
23 folk medicine) or on the perception of primary care (e.g., doctors often prescribing  
24  
25 pharmaceutical medications, or lack of time from physicians in early encounters that deterred  
26  
27 the use of current health services) [37, 38].  
28  
29  
30  
31  
32  
33  
34  
35

36  
37 There are similarities but also differences with our findings compared to other studies.  
38  
39 This paper describes how stigma operated on young people and family members of African,  
40  
41 Caribbean, and European origin and how it influenced the help-seeking process. Although all  
42  
43 young participants internalized stigma as shame, fearing lifelong discrimination for their mental  
44  
45 health conditions, which often prevented them from disclosing their symptoms to others and  
46  
47 ask for professional help, those of African and Caribbean origin also internalized a sense of guilt  
48  
49 for their conditions, holding them back from talking about their problems as well as pushing  
50  
51 them to try to overcome their symptoms alone.  
52  
53  
54  
55  
56  
57  
58  
59  
60

1  
2  
3  
4 As mentioned, Caribbean young people described the role of cultural beliefs about  
5  
6 mental illness and of religion in delay in getting treatment. African and Caribbean young people  
7  
8 were able to distinguish the difference between their own beliefs about mental illness and  
9  
10 those of their cultural groups. They were critical of traditional cultural beliefs, that see mental  
11  
12 illness as a sin for which praying to God is a solution. However, the stigma has been internalized  
13  
14 as guilt, which influenced their decisions to seek help. It could be that young people of  
15  
16 Caribbean origin waited longer to ask for help as a way to protect their families from being  
17  
18 labelled with a taboo illness; future studies are needed to verify this hypothesis. As family  
19  
20 members of Caribbean origin described, there is a desire and need to find a space and place to  
21  
22 bring to light these issues: “We need to unload but we have no place to unload.”  
23  
24  
25  
26  
27  
28

29 Although the analysis presented in this paper helps in the understanding of some of the  
30  
31 differences in DUP between African-, Caribbean-, and European-origin immigrants, we  
32  
33 recognize that this work has some limitations First, the sample size in this study was relatively  
34  
35 small; only limited inferences can be drawn for other groups. Second, as described, the sample  
36  
37 size was defined from the quantitative part of the study. We were not able to involve any family  
38  
39 members of African origin as our original pool of participants was very small. Finally, there are  
40  
41 many different ways to group people from different ethnic groups and races. Our classification  
42  
43 was subjective, based on self-identification. At the same time, arbitrary choices were made for  
44  
45 the analysis of the quantitative part of the study—focus groups were based on these decisions.  
46  
47 We acknowledge that this did not necessarily reflect the fluidity of ethnic differences and  
48  
49 diversity of identities represented by the participants.  
50  
51  
52  
53  
54  
55  
56  
57  
58  
59  
60

1  
2  
3 We were able to ask both young people and family members for possible strategies  
4  
5 which could be used to support people in the help-seeking process and for ideas about how the  
6  
7 system of care could be improved (see Table 3). All participants described the importance of  
8  
9 anti-stigma initiatives in different settings (e.g., schools, universities, primary care  
10  
11 services/providers) and targeted to different groups. Anti-stigma initiatives could challenge  
12  
13 wrong beliefs and stereotypes around mental illness and, in particular, psychosis and raise  
14  
15 awareness about psychosis signs and symptoms to promote problem recognition. This could  
16  
17 empower young people as well as adults around them to promptly intervene if needed.  
18  
19 Furthermore, more knowledge about systems of care, early intervention programs, treatment  
20  
21 options, and positive prognosis promoted by early intervention can help young people and  
22  
23 family members to initiate help seeking and to better navigate the system. At the same time,  
24  
25 sensitivity training should be offered for general practitioners and emergency-room staff to  
26  
27 promote self-awareness on mental illness bias, the impact of stigma toward mental illness in  
28  
29 access to care and/or therapeutic relationships, and general information on early intervention  
30  
31 programs, resources, and services. Based on our findings, anti-stigma initiatives should be  
32  
33 developed through the lens of ethnocultural knowledge of and beliefs about mental health  
34  
35 problems.  
36  
37  
38  
39  
40  
41  
42  
43  
44  
45

## 46 **Conclusion**

47  
48  
49 The findings of this study suggest that stigma, especially internalized stigma, operates in  
50  
51 different ways in European-, African-, and Caribbean-origin individuals and that this could  
52  
53 explain the differences in the pathways to early intervention services for psychosis for these  
54  
55 young people. These findings could inform the development of targeted anti-stigma campaigns  
56  
57  
58  
59  
60

1  
2  
3 as well as the implementation of more equitable services for people in early stages of  
4  
5  
6 psychosis. To do so, trust needs to be redefined and gained between ethnocultural groups and  
7  
8  
9 mental health researchers/providers both in research and in clinical practice. Implementing a  
10  
11 community-based participatory framework could help to achieve this goal.  
12  
13

14 **Contributorship statement** KM contributed to the conception of the study. MF, NF, KA, and KM  
15 developed the qualitative study protocol and materials. MF and NF implemented the focus  
16 groups and MF implemented the individual interviews. MF performed data analysis, assisted by  
17 NF; they presented findings to all the authors in different stages of the process. MF wrote the  
18 manuscript and it was then revised by KM. All authors reviewed and approved the final  
19 manuscript.  
20  
21

22 **Competing interests** The authors have no conflicts of interest with respect to the publication of  
23 this manuscript.  
24

25 **Funding** This study was funded by a Canadian Institutes of Health Research (CIHR) Operating  
26 Grant (Grant #220976).  
27

28 **Data sharing** No additional data available.  
29

### 30 **ACE Project Team:**

31  
32 Kelly K. Anderson,<sup>a</sup> Suzanne Archie,<sup>b</sup> Philippe-Edouard Boursiquot,<sup>b</sup> Julie Buffett,<sup>b</sup> Denise  
33 Canso,<sup>a</sup> Manuela Ferrari,<sup>a</sup> Nina Flora,<sup>a</sup> Lew Golding,<sup>a</sup> Hayley Hamilton,<sup>a,c</sup> Asante Haughton,<sup>a</sup>  
34 Sean Kidd,<sup>a,c</sup> Laurence Kirmayer,<sup>d</sup> Steve Lurie,<sup>e</sup> Kwame McKenzie,<sup>a,c</sup> Marianne Noh,<sup>a</sup> Samuel  
35 Noh,<sup>a,c</sup> Karen O'Connor,<sup>e</sup> Jennifer Parlee,<sup>a</sup> Syb Pongracic,<sup>a</sup> Delia Reuben,<sup>a</sup> Rebecka T. Sheffield,<sup>b</sup>  
36 Laura Simich,<sup>c</sup> Taryn Tang,<sup>c</sup> Andrew Tuck<sup>a</sup>  
37  
38

39 <sup>a</sup> Social and Epidemiological Research, Centre for Addiction and Mental Health (CAMH) Toronto,  
40 Ontario, Canada  
41

42 <sup>b</sup> Department of Psychiatry and Behavioural Neurosciences, McMaster University  
43 Hamilton, Ontario, Canada  
44

45 <sup>c</sup> Department of Psychiatry, University of Toronto  
46 Toronto Ontario, Canada  
47

48 <sup>d</sup> Division of Social and Transcultural Psychiatry, McGill University  
49 Montreal Quebec, Canada  
50

51 <sup>e</sup> Canadian Mental Health Association (CMHA), Toronto Branch  
52 Toronto Ontario, Canada  
53  
54  
55  
56  
57  
58  
59  
60

1  
2  
3 The team gratefully acknowledges the clinical staff from the participating early intervention  
4 programs for their involvement in study recruitment. We also appreciate the contribution and  
5 support of the Toronto Early Intervention in Psychosis Network.  
6  
7  
8  
9  
10

## 11 12 13 14 15 16 17 18 19 20 21 22 23 24 25 26 27 28 29 30 31 32 33 34 35 36 37 38 39 40 41 42 43 44 45 46 47 48 49 50 51 52 53 54 55 56 57 58 59 60

### References

1. Jablensky A, Sartorius N, Ernberg G, et al. Schizophrenia: manifestations, incidence and course in different cultures. A World Health Organization ten-country study. *Psychol Med Monogr Suppl* 1992;20:1–97.
2. Government of Canada. The human face of mental health and mental illness in Canada. 2006. [http://www.phac-aspc.gc.ca/publicat/human-humain06/pdf/human\\_face\\_e.pdf](http://www.phac-aspc.gc.ca/publicat/human-humain06/pdf/human_face_e.pdf)
3. Health Canada. A Report on Mental Illnesses in Canada. 2002. [http://www.phac-aspc.gc.ca/publicat/miic-mmacc/pdf/men\\_ill\\_e.pdf](http://www.phac-aspc.gc.ca/publicat/miic-mmacc/pdf/men_ill_e.pdf)
4. Harvey SB, Dean K, Morgan C, et al. Self-harm in first-episode psychosis. *Br J Psychiatry* 2008;192:178–184.
5. Pompili M, Serafini G, Innamorati M, et al. Suicide risk in first episode psychosis: a selective review of the current literature. *Schizophr Res* 2011;129:1–11.
6. Dealberto MJ, Middlebro A, Farrell S. Symptoms of schizophrenia and psychosis according to foreign birth in a Canadian sample of homeless persons. *Psychiatr Serv* 2011;62:1187–1193.
7. Leff J, Sartorius N, Jablensky A, et al. The International Pilot Study of Schizophrenia: five-year follow-up findings. *Psychol Med* 1992;22: 131–145.
8. Liberman RP, Kopelowicz A. Recovery from schizophrenia: a concept in search of research. *Psychiatr Serv* 2005;56:735–742.
9. Cantor-Graae E, Selten JP. Schizophrenia and migration: a meta-analysis and review. *Am J Psychiatry* 2005;162:12–24.
10. Hjern A, Wicks S, Dalman C. Social adversity contributes to high morbidity in psychoses in immigrants—a national cohort study in two generations of Swedish residents. *Psychol Med* 2004;34:1025–33.

11. Wicks S, Hjern A, Gunnell D, et al. Social adversity in childhood and the risk of developing psychosis: a national cohort study. *Am J Psychiatry* 2005;162:1652–7.
12. Harrow M, Grossman LS, Jobe TH, et al. Do patients with schizophrenia ever show periods of recovery? A 15-year multi-follow-up study. *Schizophr Bull* 2005;31:723–34.
13. Chorlton E, McKenzie K, Morgan C, et al. Course and outcome of psychosis in black Caribbean populations and other ethnic groups living in the UK: A systematic review. *Int J Soc Psychiatry* 2012;58(4):400–8.
14. Mental Health Commission of Canada. *Changing Directions, Changing Lives: The Mental Health Strategy for Canada*. 2012.  
<http://strategy.mentalhealthcommission.ca/pdf/strategy-text-en.pdf>
15. Hansson E, Tuck A, Lurie S, and McKenzie, K, for the Task Group of the Services Systems Advisory Committee, Mental Health Commission of Canada. *Improving mental health services for immigrant, refugee, ethno-cultural and racialized groups: Issues and options for service improvement*. 2010.  
[http://www.mentalhealthcommission.ca/English/system/files/private/Diversity\\_Issues\\_Options\\_Report\\_ENG\\_0.pdf](http://www.mentalhealthcommission.ca/English/system/files/private/Diversity_Issues_Options_Report_ENG_0.pdf)
16. Archie S, Akhtar-Danesh N, Norman R, et al. Ethnic diversity and pathways to care for a first episode of psychosis in Ontario. *Schizophr Bull* 2010;36:688–701.
17. Anderson K, Flora N, Ferrari M, et al. *Comparative Study of Pathways to First-Episode Care for Psychosis in Three Ethnic Groups in Ontario: The African, Caribbean, & European (ACE) Project* (in press)
18. Krueger R, Casey MA. *Focus groups: A practical guide for applied research*. 4th edition. Thousand Oaks, CA: Sage 2009.
19. Morse J. The significance of saturation. *Qual Health Res* 1995; 5:147–9.
20. Lincoln YS, Guba EG. *Naturalistic inquiry*. Newbury Park, CA: Sage 1985
21. Braun V, Clarke A. Using thematic analysis in psychology. *Qual Res Psychol* 2006;3:77–101.
22. Goffman E. *Stigma: Notes on the management of spoiled identity*. London, UK: Penguin Books 1963
23. Link BG, Phelan JC. Conceptualizing stigma. *Annu Rev of Sociol* 2001;27:363–85.



- 1
- 2
- 3
- 4 24. Corrigan PW. Mental health stigma as social attribution: Implications for research
- 5 methods and attitude change. *Clin Psychol – Sci Pr* 2000; 7:48–67.
- 6
- 7 25. Morgan C, Mallett, R, Hutchinsonc G, Leffd J. Negative pathways to psychiatric care and
- 8 ethnicity: the bridge between social science and psychiatry. *Soc Sci Med* 2004;58:739–52
- 9
- 10 26. Boydell KM, Gladstone BM, Volpe T. Understanding help-seeking delay in the prodrome
- 11 to first episode psychosis: a secondary analysis of the perspectives of young people.
- 12 *Psychiatr Rehabil J* 2006;30:54–60.
- 13
- 14 27. Judge AM, Estroff SE, Perkins DO, et al. Recognizing and responding to early psychosis: a
- 15 qualitative analysis of individual narratives. *Psychiatr Serv* 2008;59:96–9.
- 16
- 17 28. Bergner E, Leiner AS, Carter T, et al. The period of untreated psychosis before treatment
- 18 initiation: a qualitative study of family members’ perspectives. *Compr Psychiatry*
- 19 2008;49:530–6.
- 20
- 21 29. Corcoran C. Trajectory to a first episode of psychosis: a qualitative research study with
- 22 families. *Early Interv Psychiatry* 2007;1:54–60.
- 23
- 24 30. Czuchta DM, McCay E. Help-seeking for parents of individuals experiencing a first
- 25 episode of schizophrenia. *Arch Psychiatr Nurs* 2001;15:159–70.
- 26
- 27 31. Gladstone B, Volpe T, Boydell K. Issues encountered in a qualitative secondary analysis
- 28 of help-seeking in the prodrome to psychosis. *J Behav Health Serv Res* 2007;34:431–42.
- 29
- 30 32. McCann TV, Lubman D, Clark E. First-time primary caregivers’ experience of caring for
- 31 young adults with first-episode psychosis. *Schizophr Bull* 2001;37:381–8.
- 32
- 33 33. McCann TV, Lubman D, Clark E. Primary caregivers’ satisfaction with clinicians’ response
- 34 to them as informal carers of young people with first-episode psychosis: a qualitative
- 35 study. *J Clin Nurs* 2012;21:224–231.
- 36
- 37 34. Monteiro B, dos Santos J, Martine D. Patients’ relatives delayed help seeking after a first
- 38 psychotic episode. *Rev Bras Psiquiatr* 2006;28:104–10.
- 39
- 40 35. Ritsher JB, Phelan JC. Internalized stigma predicts erosion of morale among psychiatric
- 41 outpatients. *Psychiatry Res* 2004;129:257–65.
- 42
- 43 36. Schulze B. Stigma and mental health professionals: A review of the evidence on an
- 44 intricate relationship. *Int Rev of Psychiatr* 2007;19(2):137–55.
- 45
- 46
- 47
- 48
- 49
- 50
- 51
- 52
- 53
- 54
- 55
- 56
- 57
- 58
- 59
- 60

- 1  
2  
3  
4  
5  
6  
7  
8  
9  
10  
11  
12  
13  
14  
15  
16  
17  
18  
19  
20  
21  
22  
23  
24  
25  
26  
27  
28  
29  
30  
31  
32  
33  
34  
35  
36  
37  
38  
39  
40  
41  
42  
43  
44  
45  
46  
47  
48  
49  
50  
51  
52  
53  
54  
55  
56  
57  
58  
59  
60
37. Kirmayer LJ, Weinfeld M, Burgos G, et al. Use of health care services for psychological distress by immigrants in an urban multicultural milieu. *Can J Psychiatry* 2007;52:295–304.
38. Whitley R, Kirmayer LJ, Groleau D. Understanding immigrants' reluctance to use mental health services: A qualitative study from Montreal. *Can J Psychiatry*. 2006;51:205–9

**Table 1**

| Focus Group and Interview Questions:<br><br>Young people                                                                                                                                                                                                                                                 | Focus Group and Interview Questions:<br><br>Family members                                                                                                                                                                                                                                                                                        |
|----------------------------------------------------------------------------------------------------------------------------------------------------------------------------------------------------------------------------------------------------------------------------------------------------------|---------------------------------------------------------------------------------------------------------------------------------------------------------------------------------------------------------------------------------------------------------------------------------------------------------------------------------------------------|
| <p><b>Opening question:</b></p> <p>Tell us your name and why you decided to participate in this focus group?</p> <p><b>Introductory:</b></p> <p>2. How long have you been in the program? And, if you feel like sharing it, how did you come into contact with the first-episode psychosis services?</p> | <p><b>Opening question:</b></p> <p>Tell us your name and why you decided to participate in this focus group?</p> <p><b>Introductory:</b></p> <p>2. If you feel like sharing it, how did [the person who referred you to the focus group, he/she can be your son/daughter, etc.] come into contact with mental health services the first time?</p> |

|                                                                                                                                                                                                                                                                                                                                                                                                                                                                                                                                                                                                                                                                                         |                                                                                                                                                                                                                                                                                                                                                                                                                                                                                                                                                                             |
|-----------------------------------------------------------------------------------------------------------------------------------------------------------------------------------------------------------------------------------------------------------------------------------------------------------------------------------------------------------------------------------------------------------------------------------------------------------------------------------------------------------------------------------------------------------------------------------------------------------------------------------------------------------------------------------------|-----------------------------------------------------------------------------------------------------------------------------------------------------------------------------------------------------------------------------------------------------------------------------------------------------------------------------------------------------------------------------------------------------------------------------------------------------------------------------------------------------------------------------------------------------------------------------|
| <p><b>Key questions:</b></p> <p>Based on all interviews that we conducted so far we were able to identify that: First, the help-seeking process is very complex, as you can see, many people, places, circumstances and factors are involved;</p> <p>Why do they think this happens?</p> <p>Second, we were able to identify some of the key people involved in this journey and we would like to know more from you about their roles.</p> <p>NOTE: For each provider we explore what was helpful and/or less helpful or frustrating.</p> <p>Specific question based on the analysis done (e.g., The Caribbean population have really long delays—why do they think this happens?)</p> | <p><b>Key questions:</b></p> <p>Based on all interviews that we conducted so far we were able to identify that: First, the help-seeking process is very complex, as you can see, many people, places, circumstances and factors are involved;</p> <p>Why do they think this happens?</p> <p>Second, we were able to identify some of the key people involved in this journey, you already mentioned some of them, we would like to know more from you about their roles.</p> <p>NOTE: For each provider we explore what was helpful and/or less helpful or frustrating.</p> |
| <p><b>Ending questions:</b></p> <p>We want to know how to improve the services. What can be done to better help people that experience early symptoms of psychosis to have access to treatment?</p> <p>Is there anything that we missed?</p>                                                                                                                                                                                                                                                                                                                                                                                                                                            | <p><b>Ending questions:</b></p> <p>We want to know how to improve the services. What can be done to better help people that experience early symptoms of psychosis to have access to treatment?</p> <p>Is there anything you want to say that we did not ask or you did not talk about today that you want to add?</p>                                                                                                                                                                                                                                                      |

**Table 2**

| Variables    | N  | (%)  |
|--------------|----|------|
| Sex          |    |      |
| Male         | 13 | (52) |
| Female       | 12 | (48) |
| Education    |    |      |
| >High school | 8  | (32) |
| ≤High school | 17 | (68) |

1  
2  
3  
4  
5  
6  
7  
8  
9  
10  
11  
12  
13  
14  
15  
16  
17  
18  
19  
20  
21  
22  
23  
24  
25  
26  
27  
28  
29  
30  
31  
32  
33  
34  
35  
36  
37  
38  
39  
40  
41  
42  
43  
44  
45  
46  
47  
48  
49  
50  
51  
52  
53  
54  
55  
56  
57  
58  
59  
60

|                        |    |      |
|------------------------|----|------|
| Born in Canada         |    |      |
| Yes                    | 17 | (68) |
| No                     | 8  | (32) |
| English Spoken at home |    |      |
| Yes                    | 18 | (72) |
| No                     | 5  | (20) |
| English and other      | 2  | (8)  |
| Sexual Orientation     |    |      |
| Heterosexual           | 21 | (84) |
| Homosexual             | 1  | (4)  |
| Bisexual               | 2  | (8)  |
| Other                  | 1  | (4)  |
| Relationship Status    |    |      |
| Single                 | 23 | (92) |
| Married                | 0  | (0)  |
| Cohabiting             | 1  | (4)  |
| Separated/Divorced     | 1  | (4)  |
| Parents Born in Canada |    |      |
| Both                   | 5  | (20) |
| Father Only            | 4  | (16) |
| Mother Only            | 2  | (8)  |
| Not born in Canada     | 14 | (56) |

1  
2  
3  
4  
5  
6  
7  
8  
9  
10  
11  
12  
13  
14  
15  
16  
17  
18  
19  
20  
21  
22  
23  
24  
25  
26  
27  
28  
29  
30  
31  
32  
33  
34  
35  
36  
37  
38  
39  
40  
41  
42  
43  
44  
45  
46  
47  
48  
49  
50  
51  
52  
53  
54  
55  
56  
57  
58  
59  
60

**Table 3**

1. Universal and selected prevention interventions in school are needed:
  - Education in school settings,
  - Early detection efforts should focus on identifying the full spectrum of psychotic symptoms. As youth described, withdrawal and, broadly, negative symptoms, often occur before the psychosis develops. However, these symptoms are often questioned and neglected by family members and health providers;
2. Anti-stigma initiatives are needed and should be developed through the lens of cultural knowledge of and beliefs about mental health problems;
3. Increased family involvement should be encouraged;
4. Self-referral to early intervention services may be beneficial and the possibility for a triage model should be explored;

1  
2  
3  
4  
5  
6  
7  
8  
9  
10  
11  
12  
13  
14  
15  
16  
17  
18  
19  
20  
21  
22  
23  
24  
25  
26  
27  
28  
29  
30  
31  
32  
33  
34  
35  
36  
37  
38  
39  
40  
41  
42  
43  
44  
45  
46  
47  
48  
49  
50  
51  
52  
53  
54  
55  
56  
57  
58  
59  
60

- 5. Sensitivity training should be offered for general practitioners and emergency staff on recognition, mental illness/gender bias resources, and services;
- 6. Sensitivity training should be offered for police and detention center staff.

For peer review only

## Title

The African, Caribbean, & European (ACE) Pathways to Care Study: A qualitative exploration of similarities and differences between African-, Caribbean-, and European-origin groups in pathways to care for psychosis.

Manuela Ferrari,<sup>a</sup> Nina Flora,<sup>a</sup> Kelly K. Anderson,<sup>b</sup> Andrew Tuck,<sup>a</sup> Suzanne Archie,<sup>c</sup> Sean Kidd,<sup>a,d</sup> & Kwame McKenzie<sup>a,d</sup> on behalf of the ACE Project Team

<sup>a</sup>*Social and Epidemiological Research, Centre for Addiction and Mental Health (CAMH)*

*Toronto, Ontario, Canada*

<sup>b</sup>*Department of Epidemiology & Biostatistics, Western University, London, Ontario, Canada*

<sup>c</sup>*Department of Psychiatry and Behavioural Neurosciences, McMaster University*

*Hamilton, Ontario, Canada*

<sup>d</sup>*Department of Psychiatry, University of Toronto*

*Toronto, Ontario, Canada*

**Correspondence:**

Manuela Ferrari, PhD

Social and Epidemiological Research

Centre for Addiction and Mental Health (CAMH)

455 Spadina Avenue, Suite 300

Toronto, ON M5S 2G8 CANADA

Phone: (416)535-8501 ext. 77614 Fax: (416) 979-0564

E-mail: manuela.ferrari@camh.ca

Word count : 6,433



## Abstract

**Objectives:** This paper reports on a qualitative exploration of the reasons for differences in pathways to care and duration of untreated psychosis (DUP) in the African, Caribbean, and European (ACE) Pathways to Care Study from the perspective of respondents to the study and their families. The aim was to understand differences in DUP between African-, Caribbean-, and European-origin groups.

**Setting:** Ontario, Canada.

**Participants:** Thirty-four participants in total. Twenty-five young people who had experienced a first episode of psychosis and nine family members. Participants were part of the ACE Pathways to Care Study.

**Design:** We implemented six focus groups. Among the young people there was one male and one female European-origin group, a male African-origin group, a male Caribbean-origin group; for family-member, a European-origin group a Caribbean-origin group. Furthermore, we implemented four in-depth interviews with two young African-, one Caribbean-, one European-origin women with lived experience of psychosis.

**Results:** Factors that influenced help-seeking delays across the three groups were: personal awareness of symptoms, family members' knowledge of psychotic symptoms, and knowledge of mental health services. Youth and their family members described how stigma played a key role in pathways to care by stopping them from asking for help. The way in which stigma operated on the three groups' members, from feeling ashamed to feeling guilty for their mental illnesses, helped to explain differences in DUP between the groups. Guilt feelings emerged as a prominent theme among members from the African and Caribbean groups and it was not discussed in the European focus group. Delay in entering into first-episode psychosis (FEP) programs was also influenced by the stigma perceived by young people in health care settings. This had an impact on the therapeutic relationships, disclosure of symptoms, and overall trust in the health care system.

**Conclusions:** The findings of this paper suggest that stigma, especially internalized stigma, may operate in different ways in European-, African-, and Caribbean-origin groups. This could

1  
2  
3 explain the differences in the pathways to early intervention services for psychosis for these  
4 young people. These findings could inform the development of more equitable services for  
5 people in early stages of psychosis.  
6  
7  
8  
9

10  
11 **Keywords:** First-episode Psychosis; Pathways to Care; Duration of Untreated Psychosis; Stigma;  
12 Ethnicity.  
13

#### 14 **Key messages**

- 15  
16  
17 1. The findings suggest that stigma, especially internalized stigma in African-, and Caribbean-  
18 origin groups, seems to explain differences in pathways to care between the three groups.  
19
- 20  
21 2. Delay in entering into first-episode psychosis programs was also influenced by the stigma  
22 perceived by young people in health care settings. This had an impact on the therapeutic  
23 relationships, disclosure of symptoms, and overall trust in the health care system.  
24
- 25  
26 3. Findings from this study could be used anti-stigma initiatives and sensitivity training for  
27 key-players (e.g., general practitioners, emergency staff, police). Such initiatives should be  
28 developed through the lens of cultural knowledge of and beliefs about mental health  
29 problems.  
30  
31

#### 32 **Strengths and limitations of this study**

- 33  
34  
35 1. Use qualitative methodology to explore similarity and differences in pathways to care  
36 and DUP between African-, Caribbean-, and European-origin groups.  
37  
38
- 39  
40  
41 2. Young people who experienced a first episode of psychosis and their family members  
42 were invited to review ACE Study quantitative findings and elaborate on them.  
43  
44
- 45  
46  
47 3. Young people and their family members were invited to comment on possible strategies  
48 and ideas about how the system of care could be improved  
49  
50
- 51  
52  
53 4. The sample size in this study was relatively small; only limited inferences can be drawn  
54 for other groups.  
55  
56  
57  
58  
59  
60

- 1  
2  
3  
4  
5  
6  
7  
8  
9  
10  
11  
12  
13  
14  
15  
16  
17  
18  
19  
20  
21  
22  
23  
24  
25  
26  
27  
28  
29  
30  
31  
32  
33  
34  
35  
36  
37  
38  
39  
40  
41  
42  
43  
44  
45  
46  
47
5. The sample size was defined from the quantitative part of the study. We were not able to involve any family members of African origin as our original pool of participants was very small.

## Introduction

Psychotic disorders affect 1–2% of the population and are associated with a significantly shorter life expectancy and an increased risk of self-harm and violent victimization [1-8]. Members of immigrant groups have been reported to be at an increased risk of psychosis. A number of factors are considered to be contributory, such as social deprivation and disorganization, separation from parents, and the experience of discrimination [9-14]. The Canadian literature has reported differences in the use of services by members of immigrant groups [15,16]. There are barriers to getting care for many immigrant groups [15]. Both the Canadian and international literature have investigated differences in pathways to care and service use and outcomes for people of Caribbean and African origin with psychosis [13, 16]. A longer duration of untreated psychosis (DUP) and more coercive care pathways (e.g., compulsory admission, police and criminal justice system involvement before admission) have been reported in the African- and Caribbean-origin groups in Ontario [16]; both these factors are associated with poorer outcomes [12,13].

The African, Caribbean, and European (ACE) Pathways to Care Study investigated pathways to care and the duration of untreated psychosis (DUP) in African-, Caribbean-, and European-origin groups in Ontario, Canada. The study identified differences between the three groups in the pathways to first-episode psychosis (FEP) programs. The median DUP was seven

1  
2  
3 months for the European group, nine months for the African group, and 16 months for the  
4  
5 Caribbean group. Caribbean participants in the study had fewer health services/providers in  
6  
7 their pathways to care, they more often accessed FEP programs from an in-patient admission,  
8  
9 and they faced more obstacles in their access to specialized treatment for psychosis than the  
10  
11 European group. African group members in the study more often had an emergency  
12  
13 department as first contact in their pathways [17].  
14  
15  
16  
17

18  
19 Once disparities have been identified, understanding of the reasons why they may exist  
20  
21 is necessary if we are to develop effective services. This paper reports a qualitative exploration  
22  
23 of the reasons for differences in pathways to care and DUP in the ACE Study from the  
24  
25 perspective of respondents to the study and their families. The aim was to understand  
26  
27 differences in DUP between African-, Caribbean-, and European-origin groups. To do so, we  
28  
29 explored young people's and their family members' journeys of seeking help for psychosis,  
30  
31 investigating how people responded to early signs of psychosis as well as the roles that  
32  
33 different people and services played in accessing specialized programs for psychosis.  
34  
35  
36  
37  
38

## 39 **Methods**

40  
41  
42 This study used an inductive qualitative approach to examine differences in the routes  
43  
44 to care between young people with lived experience of psychosis of African-, Caribbean-, and  
45  
46 European-origin. In this exploratory and inductive qualitative study, the data analysis and  
47  
48 interpretation developed from patterns originated in empirical data rather than a deductive  
49  
50 process where an existing theory, or a hypothesis, guides the data analysis and interpretation  
51  
52 process.  
53  
54  
55  
56  
57  
58  
59  
60

1  
2  
3 Focus groups were used as a means of generating in-depth knowledge of pathways to  
4 care, exploring the interaction between individual socio-cultural positions, young people's  
5 experiences of seeking help, and group dynamics—as each participant's narrative is generated  
6 out of the journeys of others. By using focus groups we were able to examine how participants  
7  
8 (1) interacted with each other; (2) produced and reproduced knowledge; and (3) articulated  
9 and/or defended their views [18].  
10  
11  
12  
13  
14  
15  
16  
17  
18

### 19 *Ethical considerations*

20  
21 Ethics approval was obtained from the Research Ethics Board (REB) at the Centre for  
22  
23  
24  
25  
26  
27  
28  
29  
30  
31  
32  
33  
34  
35  
36  
37  
38  
39  
40  
41  
42  
43  
44  
45  
46  
47  
48  
49  
50  
51  
52  
53  
54  
55  
56  
57  
58  
59  
60

Ethics approval was obtained from the Research Ethics Board (REB) at the Centre for  
Addiction and Mental Health, as well as from the REB at each participating hospital site of the  
ACE Study. The approved REB consent form was reviewed at the beginning of each focus group  
and interview. The consent form emphasized costs and benefits of taking part in the study, its  
voluntary nature, and each participant's ability to his/her participation at any time.  
Confidentiality procedures and data management information were described within the  
consent form and reviewed before the beginning of each focus group and interview. During  
each focus group we informed focus group participants that, while we can promise that their identity  
will be kept confidential, we could not stop or prevent participants who were in the group from sharing  
things that should be confidential.

### *Participant Recruitment*

Our groups were based on the categories developed by the Toronto District School  
Board. Respondents were asked to choose which racial or ethnic group best reflected their  
identity (see Anderson et al. for more information) [17]. Participants who took part in the ACE  
Study's semi-structured interviews were asked if they were willing to be re-contacted. Only

1  
2  
3 those who agreed were approached for the qualitative study. They were asked if they would  
4 take part in a two-hour focus group to discuss the results of the study. Participants' family  
5 members were also contacted and asked if they were willing to take part in a separate focus  
6 group. One hundred and nine quantitative interview participants were contacted to take part in  
7 a focus group or an interview. Of these, 31 declined participation, 38 could not be reached, and  
8 40 agreed to take part in the focus group or an individual interview and, due to scheduling  
9 issues, only 25 of these individuals could attend a focus group or an interview.  
10  
11  
12  
13  
14  
15  
16  
17  
18  
19  
20

21  
22 Four focus groups with young people were implemented: one male group for each of  
23 the African-, Caribbean-, and European-origin groups as well as one female European-origin  
24 groups (African = 3 male, Caribbean = 3 male, European= 7 male and women 8 male). Two focus  
25 groups were organized for the family members, one for each of the Caribbean, and European  
26 groups (European = 6, Caribbean = 3). Because of difficulty recruiting for the African and  
27 Caribbean women's groups, we adjusted the study protocol and undertook individual in-depth  
28 interviews, for total of two interviews with African women, and one interview with a Caribbean  
29 woman with lived experience of psychosis. The protocol change allowed us to have a small, but  
30 important, representation of women from these two groups. Furthermore, we were able to  
31 conduct an interview with a young woman of European origin who, due to anxiety problems,  
32 did not feel comfortable attending the focus group session.  
33  
34  
35  
36  
37  
38  
39  
40  
41  
42  
43  
44  
45  
46  
47  
48

#### 49 *Data collection*

50  
51  
52 Focus groups were conducted by the first author, MF, who acted as focus group  
53 moderator, and research assistants who were trained in focus groups, transcribing, and  
54  
55  
56  
57  
58  
59  
60

1  
2  
3 qualitative data analysis for the purpose of this study. Focus group questions were designed to  
4  
5 be conversational, open, and clear. They unfolded according to Krueger and Casey's  
6  
7 recommendations [18]: opening, introductory, key, ending (see Table 1). At the end of each  
8  
9 focus group, the research team involved in the focus group completed 30–40 minutes of  
10  
11 debriefing. During the focus groups, participants were presented with preliminary ACE Study  
12  
13 quantitative data; we focused on the differences in DUP as well as pathways to care and asked  
14  
15 participants to comment on them.  
16  
17  
18  
19

20  
21 Focus groups and in-depth interviews were digitally recorded. The digital audio files  
22  
23 were transcribed by the research assistants and reviewed for data accuracy. One research  
24  
25 assistant transcribed a focus group recording and the other reviewed the work done. Finally, all  
26  
27 material was also reviewed by MF. Focus group transcripts were then prepared to facilitate  
28  
29 thematic analysis. All participant names were changed to pseudonyms to ensure confidentiality.  
30  
31  
32  
33

34  
35 Traditional data saturation, that is, "collecting data until no new information is  
36  
37 obtained," [19, p. 147] is often an object of controversy in qualitative research literature [19].  
38  
39 As Morse described: "The *quantity* of the data in a category is not theoretically important to the  
40  
41 process of saturation. Richness of the data is driven from detailed description, not the number  
42  
43 of time something is stated. Frequency counts are out" [19, p. 148]. We used instead Morse's  
44  
45 criterion of data saturation as "adequacy" of the data, which can be obtained through specific  
46  
47 methodological choices. These methodological choices were (a) selecting and working with an  
48  
49 ethnic- and gender-cohesive sample; (b) at the same time, working with three different  
50  
51 ethnocultural groups so as to maximize and explore cultural contrasts in pathways to care—a  
52  
53  
54  
55  
56  
57  
58  
59  
60

1  
2  
3 gap in current literature; and (c) basing our sample on quantitative data analysis, which allowed  
4  
5 focus-group-member checks on the quantitative findings, as well as the possibility for rich, full,  
6  
7 and complete understanding.  
8  
9

### 10 11 12 13 14 15 *Analysis*

16  
17  
18 Thematic analysis was employed to identify, analyze, and report patterns or themes  
19  
20 within data [20]. Our thematic analysis was data driven, rather than theoretically driven,  
21  
22 making use of an inductive approach, as the themes identified were strongly linked to the data  
23  
24 themselves. We followed Braun and Clark's steps of thematic analysis [21] by: (1) familiarizing  
25  
26 ourselves with our data (transcribing data, reviewing transcriptions for accuracy, reading  
27  
28 transcriptions over and over, and noting initial ideas); (2) generating initial codes and searching  
29  
30 for themes (collating codes into potential themes); (3) reviewing and redefining themes  
31  
32 (exploring how strong the identified themes are by assisting the relationship between first  
33  
34 [code] and second [theme] level of analysis, generating a thematic map of the analysis); and (4)  
35  
36 further unpacking the analysis through the writing process (identifying themes and initial  
37  
38 stigma concepts was further explored through a review of existing models of mental health  
39  
40 stigma).  
41  
42  
43  
44  
45  
46  
47

48  
49 We compared each participant's journey to care (shared during the focus group), the  
50  
51 pathway depicted during a semi-structured interview, and the participant's medical chart.  
52  
53 Further, we performed an analysis within each ethnic group, comparing and contrasting young  
54  
55 people's narratives with those of family members, and a cross-ethnic-group analysis. As a  
56  
57  
58  
59  
60



1  
2  
3 result, in the study findings we describe themes that were common across all the narratives as  
4  
5 well as the ones that were different between the three ethnic groups. All young people's and  
6  
7 family members' names used in this paper have been changed to ensure participants'  
8  
9 confidentiality.

### 10 11 12 13 *Rigour*

14  
15  
16 Lincoln and Guba [20] defined primary criteria to assess rigour and trustworthiness of  
17  
18 the qualitative research process. Primary criteria—credibility, authenticity, criticality, and  
19  
20 integrity—are necessary to all qualitative enquiry but they are insufficient in and of themselves.  
21  
22 Trustworthiness was achieved within the study through the following criteria: *credibility* and  
23  
24 *authenticity*, attained through multiple sources of data (e.g., pathways maps generated from  
25  
26 semi-structured interviews, chart reviews, focus groups' data) as well as specific and different  
27  
28 sample strategies being employed to generate rich and meaningful data; *criticality* and  
29  
30 *integrity*, using team debriefing and analysis to ensure methodological effectiveness.  
31  
32  
33  
34  
35

### 36 37 38 **Results**

#### 39 40 *Overview of the sample*

41  
42 A total of 34 people took part in the study; 25 young people with lived experiences of  
43  
44 psychosis (origins: European = 16, African = 5, Caribbean = 4) and nine family members (origins:  
45  
46 European = 6, African = 0, Caribbean = 3). Table 2 reports the socio-demographic information  
47  
48 for young people with lived experiences of psychosis only—no socio-demographic information  
49  
50 was collected for family members at the time of the focus group.  
51  
52  
53  
54

55  
56 Findings are presented in two main sections: (1) *Understanding help seeking*, in which  
57  
58  
59  
60

1  
2  
3 we first present commonality across the three groups, and then we investigate differences in  
4  
5  
6 DUP between African-, Caribbean-, and European-origin groups. In this section we unpack the  
7  
8 role of stigma and how it operates early on in pathways to care. In this paper, stigma refers to a  
9  
10 collection of negative attitudes, beliefs about, and behaviours directed at people with mental  
11  
12 disorders, which are manifested in rejection and avoidance of, and prejudice and discrimination  
13  
14 against people with mental illness conditions [22-24]. Stigma can be a barrier for people who  
15  
16 experience mental health problems by making them reluctant to ask for help due to fear of  
17  
18 prejudice, being labelled, and discrimination by others. Internalized stigma, or self-stigma,  
19  
20 occurs when a person takes on those negative stereotypes and assumptions and applies them  
21  
22 to themselves [23, 24]. Discrimination due to mental health stigma can take place in different  
23  
24 circumstances/settings: education, employment, housing, and treatment. (2) *Understanding*  
25  
26 *delay in entering first-episode psychosis (FEP) programs*, in which we explore the relationship  
27  
28 between negative experiences, stigma, health care delivery, and illness/symptoms disclosure.  
29  
30 The themes presented in this section are also common across the three groups.  
31  
32  
33  
34  
35  
36  
37  
38  
39  
40  
41  
42

### *Understanding help seeking*

#### Common across the three groups: Knowledge, awareness, and mental health stigma

45 Consistent across all narratives, for both young people and family members, was that  
46  
47 knowledge or lack of knowledge about symptoms of psychosis, mental illness, and services  
48  
49 available to them was key to them recognizing the significance of changes in behaviour. Often  
50  
51 this knowledge was based on family members' or friends' past experiences of mental illness.  
52  
53  
54  
55  
56  
57  
58  
59  
60

1  
2  
3 Maria: The one person who really helped me to realize what I'm going through, and that I  
4 need help, is my mother. She knows what I'm going through because she went through it  
5 with my father. She helps me a lot. ...  
6  
7

8 (European youth focus group)  
9  
10

11  
12 Young people who did not have any knowledge of signs or symptoms of psychosis were  
13 aware of personal changes but did not know that they were indicative of mental illness. In  
14 these cases, family members played a key role in the help-seeking process by taking them to  
15 the hospital.  
16  
17  
18  
19  
20  
21

22  
23 Benjamin: I was schizophrenic, and I didn't know what to do. I heard voices and stuff. I did  
24 some stuff that I couldn't remember, so some people took me in ...  
25

26 Paul: I kept hearing ... weird voices, but I didn't know what is. So, later on I came ... my  
27 parents took me to the hospital ...  
28

29 (African youth focus group)  
30  
31

32 Steve: I didn't know that I needed help. I had no one around me who knew what was  
33 happening. ... I was staying with a friend, my mom was occasionally stopping by ... she saw  
34 certain signs in me, and she immediately drove me to [name of the hospital].  
35

36 (Caribbean youth focus group)  
37  
38

39 June: I wouldn't have stayed in the emergency room, I wouldn't have gone by myself ... I  
40 didn't know what was going on. ... I didn't know *I was going crazy*, ... I thought everybody  
41 was against me.  
42

43 (European youth focus group)  
44  
45  
46

47 Young people and family members who did not have awareness or knowledge of the signs or  
48 symptoms of psychosis, struggled the most to understand and/or make sense of the situations.  
49  
50  
51

52  
53 Janine: I didn't know what this illness was. I thought it was just some kind of behaviours,  
54 being angry or strange like teenagers could possibly experience sometime ... it was people  
55 from the outside who used to tell me "No, this more than just ... you know teenager's  
56 crisis." Not knowing [the] symptoms ... I just didn't know what was going on really.  
57  
58  
59  
60

1  
2  
3 (Caribbean family members' focus group)  
4  
5  
6  
7

8 Louise: My son was 17 when he had his psychotic break. I thought he was just being a  
9 typical rebellious teenager ... he smoked pot. He didn't get violent. He was so scared and I  
10 didn't know what else to do with him. I took him to [name of general hospital] ... after  
11 about 15 hours convincing them that I was not taking him home, they admitted him.  
12

13 (European family members' focus group)  
14  
15  
16  
17

18 Often, family members attributed the changes in their relatives' behaviours to growing  
19 up/going through adolescence, peer groups/wrong crowds, stress, and/or substance abuse in  
20 young adults. Family members often thought that what their relatives were experiencing was  
21 just a temporary phase in their relatives' lives without recognizing signs or symptoms of  
22 psychosis. Help seeking often occurred after doubting the early signs of psychosis and, most  
23 importantly, after feeling sadness and discomfort.  
24  
25  
26  
27  
28  
29  
30  
31  
32

33 Along with knowledge and awareness of signs or symptoms of psychosis, the role that  
34 stigma played during the help-seeking process was also constantly present in the narratives.  
35  
36 Through the analysis conducted, it was possible to identify how individual and family  
37 perceptions of mental illness influenced the internalization of stigma. For example, young  
38 people involved in the study often distinguished between their rational understandings of the  
39 mental health problems, symptoms, and causes, and, at the same time, their feelings of being  
40 trapped in emotions such as shame.  
41  
42  
43  
44  
45  
46  
47  
48  
49  
50

51 Karen: People are scared to look for help, and to ...  
52

53 Maria: And to admit to themselves even ... [Karen: Yeah!] that "I have schizophrenia"... I  
54 never told anybody.  
55  
56

57 June: I'm still ashamed of what I have.  
58  
59  
60

1  
2  
3 Samantha: Me too.

4  
5  
6 (European youth focus group)  
7  
8  
9

10 Participants described how, for fear of family members' and/or friends' reactions to their  
11 conditions, they tried to ignore the signs and symptoms by, for example, using marijuana, and  
12 attempted to hide their symptoms from others.  
13  
14

15  
16 Sandi: I was worried about what people around me might say ... once you're in the  
17 hospital you can't really keep your secret anymore. There is a huge stigma about mental  
18 illness; people tend to like to avoid it.  
19

20  
21 (European youth focus group)  
22  
23  
24  
25

26 Positive symptoms (e.g., hearing voices, bizarre behaviour, violence) were often  
27 catalysts to treatment initiation. Family members often struggled to recognize when their  
28 relative was no longer able to care for himself/herself or when he/she was asking for help as  
29 the symptoms of psychosis took over his/her ability to make decisions. This created quite a  
30 complex situation where family members felt threatened or worried about their safety and, at  
31 the same time, guilty when they had to call the emergency department, ambulance, or,  
32 unfortunately, the police. This was evident in family members' narratives.  
33  
34  
35  
36  
37  
38  
39  
40  
41  
42  
43

44 Natali: I have been there ... I couldn't stop crying for days ... when my daughter finally  
45 broke down at school ... being scary violent with us. ... the first time she finally did get to  
46 the hospital that day [name of the hospital] ... It was almost like a relief, she was safe and  
47 she was away from us ... because we were scared. We were so afraid. [Sarah:  
48 (overlapping) Yes. Yes. Yeah.]  
49

50  
51 (European family members' focus group)  
52  
53  
54

55  
56 Stigma was also closely connected to how much the person who experienced psychosis was  
57 considered responsible for his/her mental condition or was in control, or not, of his/her  
58  
59  
60

1  
2  
3 symptoms. Family members recognized that mental illness is not perceived the same as other  
4 health problems. Physical disorders, such as cancer, generate compassion in extended family  
5 members, whereas mental disorders bring reactions of distancing, blaming, and stigmatizing  
6 from members of the extended family.  
7  
8  
9

10  
11  
12 Natali: Unfortunately, I still see ... my family members not so supportive. On the surface,  
13 they are, but I see them shy away from my son. I see the stigma, it is still so much there. If  
14 he was (clears throat) you know physically ill they would be right there.  
15

16 (European family members' focus group)  
17  
18  
19

20  
21 Overall, family members described how psychosis is hidden until it manifests through a  
22 person's behaviours. It is difficult to understand what is happening to the person as well as to  
23 assess if, when, and how to intervene.  
24  
25  
26  
27  
28

29 Differences in help seeking between the three groups: Internalized stigma as feeling shame  
30 versus feeling guilty for their own condition  
31  
32  
33

34  
35 Participants of European origin internalized mental health stigma as shame about their  
36 symptoms (e.g., hearing voices, unpredictable or bizarre behaviours in front of family and  
37 friends, or irrational actions). They felt distress caused by the awareness of their past bizarre  
38 behaviours and a sense of humiliation for their conditions. In contrast, young people from  
39 African- and, even more, Caribbean-origin groups stressed their responsibility for their  
40 conditions, they felt that they had done something wrong (for having an mental illness), and  
41 they felt a sense of failure for not being able to "snap out of it"—as a participant described  
42 during a focus group. In this sense, they seemed to internalize mental health stigma as guilt—  
43 there is shame and humiliation but also they felt that they had done something wrong.  
44  
45  
46  
47  
48  
49  
50  
51  
52  
53  
54  
55  
56  
57  
58  
59  
60

1  
2  
3 Paul: ... there was a lot of pressure to excel in school and succeed. I dabbled too much in,  
4 dabbled too much in drugs, that was my problem ... that was really my fault. I have no  
5 one else to blame but myself ... people expect you to just walk it off kind of thing. But you  
6 really, you really can't, you can't really walk off a mental illness ... you can cope with it.  
7  
8

9 (African youth focus group)  
10

11 Steve: Going through a mental illness totally flipped the way I view ... everything! It's also  
12 made me become more aware of how family members react, and why are they reacting  
13 that way. Eventually it is what got me onto the culture of it, my religion, and so forth. I  
14 can't say exactly what it is about the Caribbean culture ... but, I can tell, those two things  
15 definitely play a factor in it.  
16  
17

18 (Caribbean youth focus group)  
19  
20

21  
22 In the African and Caribbean focus groups, participants discussed the role that religion  
23 had in shaping their and their families' perceptions of mental illness and feelings of guilt for  
24 their condition—this topic was not discussed in the European focus groups. In some cases,  
25 people described how they grew up thinking that mental illness was a sin or God's punishment.  
26  
27 Although they did not think in this way now, they saw how this perception influenced their  
28 understanding of early signs of psychosis, the focuses of their paranoid symptoms (in some  
29 cases), and, most importantly, their asking for help.  
30  
31  
32  
33  
34  
35  
36  
37  
38  
39  
40

41 Suzanne: Well, it made me feel badly because I thought, "Wow. You know, she's so  
42 nervous [mother] about me going to the hospital for help." It made me feel kind of  
43 ashamed that I needed help. ... I guess it made me a little bit reluctant to seek care later  
44 on. [Later on in the interview] ... in the beginning my mom was like, "Suzanne you need to  
45 PRAY more. That's the problem." And, I'm like, "No mom, I need medication. I need some  
46 help." ... Sometimes I just tell her that I prayed just so she can get off my case. My brother  
47 often tell me that my life has gone in this direction because I stopped going to church. ... It  
48 makes me feel bad. It's not helpful me to get better.  
49  
50

51 (Caribbean youth interview)  
52  
53  
54  
55

56 Greg: I can't say everybody but, A LOT of people in my family, and in the community ...  
57 they become very superstitious. It's a mind job with Catholicism first of all—and no  
58  
59  
60

1  
2  
3 offense to anybody here who's Catholic, I am Catholic. Something simple as, as having a  
4 mental condition, is not simple in this world anymore, it becomes then, "that person  
5 needs to be exorcised, or that person's got bad demons—"  
6  
7

8 Steve: (overlapping) Oh, I've heard ... I've heard that, I've heard that, to get rid of my  
9 voices I have to get an exorcism.  
10

11 Greg: Yeah.  
12

13 Steve: That's what I heard from a friend.  
14

15 Greg: Like, my mom said that when she was uh, a kid, when she was like 5 or 6, she  
16 actually witnessed someone getting exorcised, because of voices in his head and stuff like  
17 that.  
18  
19

20 (Caribbean youth focus group)  
21  
22  
23  
24

25 As described, African- and, even more, Caribbean-origin young people reported that their  
26 mental illnesses were taboos among members of their close or extended families. While young  
27 people of African origin had their families around to support their struggles, young people of  
28 Caribbean origin who attended the focus groups had no one or only a few close family  
29 members. The support networks that could assist them in seeking help were not available.  
30  
31  
32  
33  
34  
35  
36  
37

38 Simone: When people in the Caribbean get to know that your child has this issue [mental  
39 illness] ... the whole family is labelled ... from the grandparent right the way down. The  
40 family is labelled and you are sort of ostracized. That's why many of us don't want to  
41 bring it up to the light ... we are in denial that this is not happening to this family. ... We,  
42 as parents, don't have the freedom to talk about it ... because of the stigma that's still  
43 attached ... we internalize it. When we internalize, we're stressed. We would love to know  
44 that there is somewhere that we can go and sit down and talk. We need to unload but we  
45 have no place to unload.  
46  
47  
48

49 (Caribbean family members' focus group)  
50  
51  
52  
53  
54

55 African- and Caribbean-origin participants described how when they experienced early  
56 signs of psychosis, they tried to control them and they felt guilty if they were not able to. Their  
57 sense of guilt was also connected with cultural interpretation of mental illness as sin, God's  
58  
59  
60



1  
2  
3 punishment, and a taboo illness heavily stigmatized—themes more present in the Caribbean-  
4 origin focus group and interviews.  
5  
6

7  
8 *Understanding delay in entering first-episode psychosis programs (FEP)*  
9

10  
11 Rachel: Now none of these people [university psychological service/psychiatrist] told me  
12 about any other resources. ... All I knew was [name of mental health hospital], which was,  
13 like, the last resort. ... I was in the dark. And then I went to my family doctor, and she was  
14 the first person after like 3 months who told us that, “Oh, there’s actually an in-patient  
15 program at [name of a general hospital], for if you’re in an emergency—go there.” ... So  
16 then when I got really bad, I was in the in-patient at [name of a general hospital] and  
17 there, it was when I actually found out about a bunch of other resources ...”  
18  
19

20  
21 (European youth focus group)  
22  
23

24  
25 Participants often recognized changes in behaviours and thinking but they did not always  
26 attribute these to a mental illness; however they were active in seeking help, contacting  
27 community services (e.g., school or university health services) or their family doctors, if they  
28 had one. In reflecting on their pathways, they often felt upset, as early attempts to ask for help  
29 were dismissed by providers and/or information was not provided to them.  
30  
31  
32  
33  
34  
35  
36

37 Negative experiences, stigma and care: First contact, therapeutic relationship, and disclosure of  
38  
39 symptoms  
40  
41

42  
43 Once in the system, groups’ differences in the journeys to specialized treatment seemed  
44 less present. Before entering into early intervention programs, young people saw between four  
45 and six difference health providers/services (e.g., family doctor, emergency, police, detention  
46 centre, in-patient unit). As young people described, the care they received (or did not receive)  
47 and health care providers’ attitudes towards mental illness influenced what they shared about  
48 their mental states (e.g., hearing voices, suicidal thoughts) and, overall, their trust in the  
49  
50  
51  
52  
53  
54  
55  
56  
57  
58  
59  
60

1  
2  
3 system. From the first contact with a hospital, the majority of young people involved in the  
4  
5 focus groups reported that, if it was a negative experience, it affected their therapeutic  
6  
7 relationships, and, generally, their willingness to stay in the system and to return, if needed, a  
8  
9 second time.  
10

14 Samantha: From my experience there's a lot of stigma and shame surrounding people  
15 who have substance abuse problems. Whenever I've been in treatment, there has not  
16 been an accepting atmosphere for me to discuss my issues or to make me feel like I'm  
17 actually going to get help.  
18

20 (European youth focus group)  
21  
22  
23

24 Steve: Well, I found, like, a number of them [mental health care providers] definitely  
25 helped. I feel that the majority of [hospital name] staff definitely does have that, but  
26 there are still the ones that can create that negative experience for you when you're  
27 already going through a negative experience. ... It's funny ... you're going through stuff,  
28 even though your mind's not in the right place, you still remember all the negativity. ...  
29 [Andy: (overlapping) Yeah.] Yeah. Those are the things that I will always remember, about  
30 [name of the hospital] and dealing with [the staff] at the first time. Like, although they  
31 were there to help me, it didn't seem like half had actually studied mental health at all.  
32  
33  
34

35 (Caribbean youth focus group)  
36  
37  
38  
39

40 During the focus groups and interviews, participants reported how their experiences of  
41 poor quality of care was due to health providers' negative attitudes and behaviours towards  
42 mental illness. Indeed, stigma does operate, albeit marginally, in mental health services, such as  
43 primary care (e.g., family doctors), emergency departments, in-patient units, out-patient units,  
44 and so on and, when present, it seems to be more hurtful than when experienced outside the  
45 health care system.  
46  
47  
48  
49  
50  
51  
52  
53  
54  
55  
56

57 Eight young people who took part in the focus groups had police and detention centres  
58  
59  
60

1  
2  
3 as early contacts in their pathways to FEP treatment. Overall, police officers were perceived to  
4  
5 be supportive, helpful, and understanding of the situations. Police officers have the duty to  
6  
7 respond to an emergency call, accompany the person to the hospital emergency room, and stay  
8  
9 with them until the hospital staff takes over.  
10  
11

12  
13  
14 Linda: I did it twice. The first time, I went to the hospital was in an ambulance, and, the  
15  
16 second time was ... in a police car. I actually found the police were nice. Like, I was in  
17  
18 handcuffs [laughter], but I found them to be really nice ... they stayed with me until the  
19  
20 doctors started seeing me. They didn't judge me, and I asked the one cop if he was  
21  
22 married ... he was like showing me pictures of his kids. He was just nice.

23  
24  
25  
26  
27 (European youth focus group)

28  
29 Three men of European origin had forensic services in their pathways. In these cases, the young  
30  
31 men had to stay in detention for several days before they were able to see a judge. During the  
32  
33 focus groups they described how they were exposed to verbal and physical violence as well as  
34  
35 the trauma of experiencing psychotic episodes while in detention.  
36  
37

38  
39 Rob: Well, for me the cops were ok. But, then at the detention centre, I said something  
40  
41 really dumb to the correctional officer and ... I'm walking ... he literally just POUNDS me,  
42  
43 he beat the shit out of me. Right there on the ground. I wasn't shaken by it at all because I  
44  
45 was psychotic, but like—I don't know, it was really weird. He literally took me from  
46  
47 behind and just pounded me. I guess his superior comes in and takes him off me. I guess  
48  
49 the cops are ok but the guys in the jail ...

50  
51 Matt: Yeah, I had the same experience. One time, when I was psychotic, my mom called  
52  
53 the police on me ... She meant for me to go to the hospital but I got charged by the police  
54  
55 with a bunch of things. They sent me to JAIL, and I was completely psychotic ... they didn't  
56  
57 know what to do with me. They were physical with me, they injected me in the back of  
58  
59 my neck with I don't know what medication. They just locked me in a jail cell for probably  
60  
61 a month until I was transferred to a medical facility.

62  
63  
64  
65  
66 (European youth focus group)

1  
2  
3 It was interesting to notice that men of European origin were able to share these experiences  
4  
5 during the focus group, whereas men of African and Caribbean origin just mentioned police  
6  
7 involvement in their pathways without elaborating on it. We realized the sensitivity of this topic  
8  
9 which, combined with the sense of guilt, probably precluded any further disclosure.  
10  
11  
12  
13

14 In total, 10 youth had family doctors as first contact in their pathways. Among all focus  
15  
16 groups, there was only one case in which referral was made to an FEP program directly by a  
17  
18 general practitioner. The majority of them reported to have been misdiagnosed or had their  
19  
20 symptoms dismissed by their family doctors.  
21  
22  
23

24  
25 Benjamin: ... the family doctor doesn't, uh well, didn't work for me, he thought it was just  
26  
27 anxiety, like ... anxiety because of school ... 'cause I was going into university.

28  
29 (African youth focus group)  
30  
31  
32

33 In other cases, a young man and woman described how their family doctors focused only on  
34  
35 their substance abuse problems and reprimanded them for their behaviours.  
36  
37  
38

39 Steve: I kind of did [went to see my family doctor at first], but, he turned me down flatly,  
40  
41 'cause I was smoking weed. I said, "I thinking, I'm suffering with depression." He asked me  
42  
43 if I did drugs, I said that I did smoke weed quite often, and he said stop smoking the weed  
44  
45 then "come back and I help you." I never heard about it after that. Next time, I saw him, I  
46  
47 had to tell him that, yeah, I was diagnosed with schizophrenia. So, my general  
48  
49 practitioner, unfortunately, wasn't able to do anything at the time.

50  
51 (Caribbean youth focus group)  
52  
53  
54

55 Jill: I recognized the symptoms but I didn't know the specifics of my diagnosis. I went to  
56  
57 the family doctor and explained that I felt that I was being followed and everything. And  
58  
59 then he told me, "Okay. You need to stop doing drugs," 'cause I was high on marijuana  
60  
61 when it first happened ... but [it happened] several time [before] and I just thought it was  
62  
63 the pot.

64  
65 (African youth interview)  
66  
67  
68  
69  
70

1  
2  
3  
4  
5 It may be difficult for general practitioners to diagnose psychosis early; however, participants  
6  
7  
8 felt that they had actively sought help but their requests were misunderstood or dismissed.  
9

10  
11 When admitted to emergency units or in-patient services, participants described the  
12  
13 following negative experiences: being labelled, feeling like a number, feeling no longer a person  
14  
15 but an illness, being judged for behaviours/symptoms, and/or being treated like a child.  
16  
17  
18

19  
20 Matt: I don't know, how it makes sense, but [hospital staff] were almost like TOO nice ... I  
21 don't know the word, like, treating you like you're a child ... talking down to you. It was  
22 NICE, but it didn't make me feel better ... other people were nice but, at the same time ...  
23 made you feel like an equal. I felt like that was important.  
24

25  
26 Steve: I think maybe the word you were looking for was "pity." Like we were treated with  
27 PITY [Matt: Yeah.] Yeah. I think that, people think that people with schizophrenia are  
28 somehow STUPIDER or something ... I don't think people with schizophrenia are stupid at  
29 all.  
30

31 (European youth focus group)  
32

33  
34 Robin: They treat you like a number [mumbles of agreement].  
35

36 Samantha: When I went to the hospital last time ... I was going through a panic attack  
37 when I FIRST found out I had schizophrenia, and they, the nurse was like, "Yeah, you're  
38 just faking it, you're perfectly fine, nothing's wrong with you."  
39

40 Robin: Yeah.  
41

42 Samantha: It really, made me not like being in the hospital. I did not want to go back  
43 there ever.  
44

45  
46 Natali: I agree. I think they treat you more like a number. And I think, being treated like  
47 a PERSON instead of a number or a case because, if you're just a case, you're like "I'm  
48 schizophrenic" ... you're not a person, anymore [mumbles of agreement].  
49

50 (European youth focus group)  
51  
52  
53  
54  
55

56 According to young people, all of these factors influenced the therapeutic relationship  
57  
58  
59  
60

1  
2  
3 with services and providers and, in particular, affected young people's disclosures of  
4 symptoms—as described.  
5  
6  
7

## 8 9 **Discussion**

10  
11  
12 Differences in pathways to care and the duration of untreated psychosis have been  
13 reported in some studies of ethnic minority groups [13, 16]. The reasons for these differences  
14 are unclear [25]. In this paper, the authors focused on participants' narrative accounts to  
15 investigate the social and cultural contexts of help seeking. In doing so, we were able to further  
16 investigate differences between the groups as well as how a number of factors, including  
17 stigma, influenced both help seeking and access to specialized programs. We developed  
18 preliminary hypotheses about the link between internalized stigma, cultural beliefs about  
19 mental illness, and help seeking. At the same time, we discussed how interactions with health  
20 care settings shape the experience of asking for help, influencing future engagement with  
21 health providers and/or willingness to disclose symptoms.  
22  
23  
24  
25  
26  
27  
28  
29  
30  
31  
32  
33  
34  
35  
36  
37

38 In our attempt to understand differences in the pathways to care and DUP between  
39 African-, Caribbean-, and European-origin groups, we found similarities to other studies that  
40 broadly explore help seeking among young people in FEP programs [26, 27] and their families  
41 [28-33] without focusing on ethnicity. As with our findings, other qualitative works described  
42 long and difficult periods from the realization of signs and symptoms of psychosis to the  
43 initiation of help seeking [28-31]. As other studies reported, family members described how the  
44 role of caregiver was emotionally draining [32] due to their inability to understand and cope  
45 with the changes in their family members, feelings of guilt after calling the police, as well as  
46  
47  
48  
49  
50  
51  
52  
53  
54  
55  
56  
57  
58  
59  
60

1  
2  
3 frustration of their inability to navigate the health care system and/or lack of involvement in  
4  
5 the treatment program [33]. Family members' knowledge of mental illness and services  
6  
7 available to them was important in dealing with the situations. However, as other studies  
8  
9 described, they often mistook early signs of psychosis—especially in the prodromal phase of  
10  
11 the illness—for mood changes due to adolescence, social withdrawal, stress, or drugs [26-30].  
12  
13 At the same time, even if the young people who took part in our study recognized changes in  
14  
15 themselves, they did not attribute these changes to mental illness—as was also described in  
16  
17 other studies [26, 30]. Moreover, as we discussed, because of the associated stigma, young  
18  
19 people and family members engaged in denial, avoidance, and hiding of early symptoms of  
20  
21 psychosis which prevented them from seeking help [26-34].  
22  
23  
24  
25  
26  
27  
28

29 In *Stigma*, Goffman [22] defined and discussed stigma as *discredited* versus  
30  
31 *discreditable*; in the first case, a visible and physical mark defines stigma, where, in the second,  
32  
33 no visible or physical mark is present—as is the case with the stigma of mental illness. More  
34  
35 recently, further theories have been developed and used to understand the relationship  
36  
37 between stigma and mental illness (see Link & Phelan [23], and Corrigan [24]). In all of these  
38  
39 theories, stigma is based on signs that define who is different, stereotypes about the person or  
40  
41 group, marginalization, avoidance, discrimination, fear of what or who is different—where  
42  
43 normality and abnormality or similarity and difference are defined by socio-cultural norms and  
44  
45 beliefs. Furthermore, internalized stigma seems more distractive and harmful to the affected  
46  
47 person's health and, broadly, to his/her sense of self [35].  
48  
49  
50  
51  
52  
53

54 Several studies investigate stigma and mental illness [33, 35, 36]. Stigma about mental  
55  
56 illness is prevalent in the general public but, unfortunately, occurs in health and mental health  
57  
58  
59  
60

1  
2  
3 settings as well [36]. Work done in the Canadian context recognizes the role of stigma in  
4  
5 seeking help for mental illness in immigrant and refugee groups in Canada. The *Improving*  
6  
7 *mental health services for immigrant, refugee, ethno-cultural and racialized groups: Issues and*  
8  
9 *options for service development* report describes how immigrants, refugees, and racialized  
10  
11 groups are less likely to ask about mental health systems because of possible stigma and this  
12  
13 leads either to people not getting treatment or to a delay in getting treatment [15]. Other  
14  
15 studies describe the specific needs and issues that immigrant groups are facing in relation to  
16  
17 mental health services in urban settings in Canada [37, 38]. These studies, which were  
18  
19 conducted with West Indian immigrants in Montreal, focus on cultural beliefs in non-medical  
20  
21 interventions as the preferred form of treatment for mental illness (e.g., prayer or traditional  
22  
23 folk medicine) or on the perception of primary care (e.g., doctors often prescribing  
24  
25 pharmaceutical medications, or lack of time from physicians in early encounters that deterred  
26  
27 the use of current health services) [37, 38].  
28  
29  
30  
31  
32  
33  
34  
35

36  
37 There are similarities but also differences with our findings compared to other studies.  
38  
39 This paper describes how stigma operated on young people and family members of African,  
40  
41 Caribbean, and European origin and how it influenced the help-seeking process. Although all  
42  
43 young participants internalized stigma as shame, fearing lifelong discrimination for their mental  
44  
45 health conditions, which often prevented them from disclosing their symptoms to others and  
46  
47 ask for professional help, those of African and Caribbean origin also internalized a sense of guilt  
48  
49 for their conditions, holding them back from talking about their problems as well as pushing  
50  
51 them to try to overcome their symptoms alone.  
52  
53  
54  
55  
56  
57  
58  
59  
60



1  
2  
3 As mentioned, Caribbean young people described the role of cultural beliefs about  
4 mental illness and of religion in delay in getting treatment. African and Caribbean young people  
5 were able to distinguish the difference between their own beliefs about mental illness and  
6 those of their cultural groups. They were critical of traditional cultural beliefs, that see mental  
7 illness as a sin for which praying to God is a solution. However, the stigma has been internalized  
8 as guilt, which influenced their decisions to seek help. It could be that young people of  
9 Caribbean origin waited longer to ask for help as a way to protect their families from being  
10 labelled with a taboo illness; future studies are needed to verify this hypothesis. As family  
11 members of Caribbean origin described, there is a desire and need to find a space and place to  
12 bring to light these issues: “We need to unload but we have no place to unload.”  
13  
14  
15  
16  
17  
18  
19  
20  
21  
22  
23  
24  
25  
26  
27  
28

29 Although the analysis presented in this paper helps in the understanding of some of the  
30 differences in DUP between African-, Caribbean-, and European-origin immigrants, we  
31 recognize that this work has some limitations. First, the sample size in this study was relatively  
32 small; only limited inferences can be drawn for other groups. Second, as described, the sample  
33 size was defined from the quantitative part of the study. We were not able to involve any family  
34 members of African origin as our original pool of participants was very small. Finally, there are  
35 many different ways to group people from different ethnic groups and races. Our classification  
36 was subjective, based on self-identification. At the same time, arbitrary choices were made for  
37 the analysis of the quantitative part of the study—focus groups were based on these decisions.  
38 We acknowledge that this did not necessarily reflect the fluidity of ethnic differences and  
39 diversity of identities represented by the participants.  
40  
41  
42  
43  
44  
45  
46  
47  
48  
49  
50  
51  
52  
53  
54  
55  
56  
57  
58  
59  
60

1  
2  
3 We were able to ask both young people and family members for possible strategies  
4 which could be used to support people in the help-seeking process and for ideas about how the  
5 system of care could be improved (see Table 3). All participants described the importance of  
6 anti-stigma initiatives in different settings (e.g., schools, universities, primary care  
7 services/providers) and targeted to different groups. Anti-stigma initiatives could challenge  
8 wrong beliefs and stereotypes around mental illness and, in particular, psychosis and raise  
9 awareness about psychosis signs and symptoms to promote problem recognition. This could  
10 empower young people as well as adults around them to promptly intervene if needed.  
11 Furthermore, more knowledge about systems of care, early intervention programs, treatment  
12 options, and positive prognosis promoted by early intervention can help young people and  
13 family members to initiate help seeking and to better navigate the system. At the same time,  
14 sensitivity training should be offered for general practitioners and emergency-room staff to  
15 promote self-awareness on mental illness bias, the impact of stigma toward mental illness in  
16 access to care and/or therapeutic relationships, and general information on early intervention  
17 programs, resources, and services. Based on our findings, anti-stigma initiatives should be  
18 developed through the lens of ethnocultural knowledge of and beliefs about mental health  
19 problems.

## 20 21 22 23 24 25 26 27 28 29 30 31 32 33 34 35 36 37 38 39 40 41 42 43 44 45 46 47 **Conclusion**

48  
49 The findings of this study suggest that stigma, especially internalized stigma, operates in  
50 different ways in European-, African-, and Caribbean-origin individuals and that this could  
51 explain the differences in the pathways to early intervention services for psychosis for these  
52 young people. These findings could inform the development of targeted anti-stigma campaigns  
53  
54  
55  
56  
57  
58  
59  
60

1  
2  
3 as well as the implementation of more equitable services for people in early stages of  
4  
5  
6 psychosis. To do so, trust needs to be redefined and gained between ethnocultural groups and  
7  
8  
9 mental health researchers/providers both in research and in clinical practice. Implementing a  
10  
11 community-based participatory framework could help to achieve this goal.  
12

13  
14 **Contributorship statement** KM contributed to the conception of the study. MF, NF, KA, and KM  
15 developed the qualitative study protocol and materials. MF and NF implemented the focus  
16 groups and MF implemented the individual interviews. MF performed data analysis, assisted by  
17 NF; they presented findings to all the authors in different stages of the process. MF wrote the  
18 manuscript and it was then revised by KM. All authors reviewed and approved the final  
19 manuscript.  
20

21  
22 **Competing interests** The authors have no conflicts of interest with respect to the publication of  
23 this manuscript.  
24

25 **Funding** This study was funded by a Canadian Institutes of Health Research (CIHR) Operating  
26 Grant (Grant #220976).  
27

28 **Data sharing** No additional data available.  
29

30 **ACE Project Team:**  
31

32 Kelly K. Anderson,<sup>a</sup> Suzanne Archie,<sup>b</sup> Philippe-Edouard Boursiquot,<sup>b</sup> Julie Buffett,<sup>b</sup> Denise  
33 Canso,<sup>a</sup> Manuela Ferrari,<sup>a</sup> Nina Flora,<sup>a</sup> Lew Golding,<sup>a</sup> Hayley Hamilton,<sup>a,c</sup> Asante Haughton,<sup>a</sup>  
34 Sean Kidd,<sup>a,c</sup> Laurence Kirmayer,<sup>d</sup> Steve Lurie,<sup>e</sup> Kwame McKenzie,<sup>a,c</sup> Marianne Noh,<sup>a</sup> Samuel  
35 Noh,<sup>a,c</sup> Karen O'Connor,<sup>e</sup> Jennifer Parlee,<sup>a</sup> Syb Pongracic,<sup>a</sup> Delia Reuben,<sup>a</sup> Rebecka T. Sheffield,<sup>b</sup>  
36 Laura Simich,<sup>c</sup> Taryn Tang,<sup>c</sup> Andrew Tuck<sup>a</sup>  
37  
38

39 <sup>a</sup> Social and Epidemiological Research, Centre for Addiction and Mental Health (CAMH) Toronto,  
40 Ontario, Canada  
41

42 <sup>b</sup> Department of Psychiatry and Behavioural Neurosciences, McMaster University  
43 Hamilton, Ontario, Canada  
44

45 <sup>c</sup> Department of Psychiatry, University of Toronto  
46 Toronto Ontario, Canada  
47

48 <sup>d</sup> Division of Social and Transcultural Psychiatry, McGill University  
49 Montreal Quebec, Canada  
50

51 <sup>e</sup> Canadian Mental Health Association (CMHA), Toronto Branch  
52 Toronto Ontario, Canada  
53  
54  
55  
56  
57  
58  
59  
60

1  
2  
3 The team gratefully acknowledges the clinical staff from the participating early intervention  
4 programs for their involvement in study recruitment. We also appreciate the contribution and  
5 support of the Toronto Early Intervention in Psychosis Network.  
6  
7  
8  
9  
10  
11  
12  
13

## 14 15 16 17 18 19 20 21 22 23 24 25 26 27 28 29 30 31 32 33 34 35 36 37 38 39 40 41 42 43 44 45 46 47 48 49 50 51 52 53 54 55 56 57 58 59 60

### References

1. Jablensky A, Sartorius N, Ernberg G, et al. Schizophrenia: manifestations, incidence and course in different cultures. A World Health Organization ten-country study. *Psychol Med Monogr Suppl* 1992;20:1–97.
2. Government of Canada. The human face of mental health and mental illness in Canada. 2006. [http://www.phac-aspc.gc.ca/publicat/human-humain06/pdf/human\\_face\\_e.pdf](http://www.phac-aspc.gc.ca/publicat/human-humain06/pdf/human_face_e.pdf)
3. Health Canada. A Report on Mental Illnesses in Canada. 2002. [http://www.phac-aspc.gc.ca/publicat/miic-mmacc/pdf/men\\_ill\\_e.pdf](http://www.phac-aspc.gc.ca/publicat/miic-mmacc/pdf/men_ill_e.pdf)
4. Harvey SB, Dean K, Morgan C, et al. Self-harm in first-episode psychosis. *Br J Psychiatry* 2008;192:178–184.
5. Pompili M, Serafini G, Innamorati M, et al. Suicide risk in first episode psychosis: a selective review of the current literature. *Schizophr Res* 2011;129:1–11.
6. Dealberto MJ, Middlebro A, Farrell S. Symptoms of schizophrenia and psychosis according to foreign birth in a Canadian sample of homeless persons. *Psychiatr Serv* 2011;62:1187–1193.
7. Leff J, Sartorius N, Jablensky A, et al. The International Pilot Study of Schizophrenia: five-year follow-up findings. *Psychol Med* 1992;22: 131–145.
8. Liberman RP, Kopelowicz A. Recovery from schizophrenia: a concept in search of research. *Psychiatr Serv* 2005;56:735–742.
9. Cantor-Graae E, Selten JP. Schizophrenia and migration: a meta-analysis and review. *Am J Psychiatry* 2005;162:12–24.
10. Hjern A, Wicks S, Dalman C. Social adversity contributes to high morbidity in psychoses in immigrants—a national cohort study in two generations of Swedish residents. *Psychol Med* 2004;34:1025–33.

11. Wicks S, Hjern A, Gunnell D, et al. Social adversity in childhood and the risk of developing psychosis: a national cohort study. *Am J Psychiatry* 2005;162:1652–7.
12. Harrow M, Grossman LS, Jobe TH, et al. Do patients with schizophrenia ever show periods of recovery? A 15-year multi-follow-up study. *Schizophr Bull* 2005;31:723–34.
13. Chorlton E, McKenzie K, Morgan C, et al. Course and outcome of psychosis in black Caribbean populations and other ethnic groups living in the UK: A systematic review. *Int J Soc Psychiatry* 2012;58(4):400–8.
14. Mental Health Commission of Canada. Changing Directions, Changing Lives: The Mental Health Strategy for Canada. 2012.  
<http://strategy.mentalhealthcommission.ca/pdf/strategy-text-en.pdf>
15. Hansson E, Tuck A, Lurie S, and McKenzie, K, for the Task Group of the Services Systems Advisory Committee, Mental Health Commission of Canada. Improving mental health services for immigrant, refugee, ethno-cultural and racialized groups: Issues and options for service improvement. 2010.  
[http://www.mentalhealthcommission.ca/English/system/files/private/Diversity\\_Issues\\_Options\\_Report\\_ENG\\_0.pdf](http://www.mentalhealthcommission.ca/English/system/files/private/Diversity_Issues_Options_Report_ENG_0.pdf)
16. Archie S, Akhtar-Danesh N, Norman R, et al. Ethnic diversity and pathways to care for a first episode of psychosis in Ontario. *Schizophr Bull* 2010;36:688–701.
17. Anderson K, Flora N, Ferrari M, et al. Comparative Study of Pathways to First-Episode Care for Psychosis in Three Ethnic Groups in Ontario: The African, Caribbean, & European (ACE) Project (in press)
18. Krueger R, Casey MA. Focus groups: A practical guide for applied research. 4th edition. Thousand Oaks, CA: Sage 2009.
19. Morse J. The significance of saturation. *Qual Health Res* 1995; 5:147–9.
20. Lincoln YS, Guba EG. Naturalistic inquiry. Newbury Park, CA: Sage 1985
21. Braun V, Clarke A. Using thematic analysis in psychology. *Qual Res Psychol* 2006;3:77–101.
22. Goffman E. Stigma: Notes on the management of spoiled identity. London, UK: Penguin Books 1963
23. Link BG, Phelan JC. Conceptualizing stigma. *Annu Rev of Sociol* 2001;27:363–85.

- 1  
2  
3  
4  
5  
6  
7  
8  
9  
10  
11  
12  
13  
14  
15  
16  
17  
18  
19  
20  
21  
22  
23  
24  
25  
26  
27  
28  
29  
30  
31  
32  
33  
34  
35  
36  
37  
38  
39  
40  
41  
42  
43  
44  
45  
46  
47  
48  
49  
50  
51  
52  
53  
54  
55  
56  
57  
58  
59  
60
24. Corrigan PW. Mental health stigma as social attribution: Implications for research methods and attitude change. *Clin Psychol – Sci Pr* 2000; 7:48–67.
25. Morgan C, Mallett, R, Hutchinsonc G, Leffd J. Negative pathways to psychiatric care and ethnicity: the bridge between social science and psychiatry. *Soc Sci Med* 2004;58:739–52
26. Boydell KM, Gladstone BM, Volpe T. Understanding help-seeking delay in the prodrome to first episode psychosis: a secondary analysis of the perspectives of young people. *Psychiatr Rehabil J* 2006;30:54–60.
27. Judge AM, Estroff SE, Perkins DO, et al. Recognizing and responding to early psychosis: a qualitative analysis of individual narratives. *Psychiatr Serv* 2008;59:96–9.
28. Bergner E, Leiner AS, Carter T, et al. The period of untreated psychosis before treatment initiation: a qualitative study of family members' perspectives. *Compr Psychiatry* 2008;49:530–6.
29. Corcoran C. Trajectory to a first episode of psychosis: a qualitative research study with families. *Early Interv Psychiatry* 2007;1:54–60.
30. Czuchta DM, McCay E. Help-seeking for parents of individuals experiencing a first episode of schizophrenia. *Arch Psychiatr Nurs* 2001;15:159–70.
31. Gladstone B, Volpe T, Boydell K. Issues encountered in a qualitative secondary analysis of help-seeking in the prodrome to psychosis. *J Behav Health Serv Res* 2007;34:431–42.
32. McCann TV, Lubman D, Clark E. First-time primary caregivers' experience of caring for young adults with first-episode psychosis. *Schizophr Bull* 2001;37:381–8.
33. McCann TV, Lubman D, Clark E. Primary caregivers' satisfaction with clinicians' response to them as informal carers of young people with first-episode psychosis: a qualitative study. *J Clin Nurs* 2012;21:224–231.
34. Monteiro B, dos Santos J, Martine D. Patients' relatives delayed help seeking after a first psychotic episode. *Rev Bras Psiquiatr* 2006;28:104–10.
35. Ritsher JB, Phelan JC. Internalized stigma predicts erosion of morale among psychiatric outpatients. *Psychiatry Res* 2004;129:257–65.
36. Schulze B. Stigma and mental health professionals: A review of the evidence on an intricate relationship. *Int Rev of Psychiatr* 2007;19(2):137–55.

- 1  
2  
3  
4  
5  
6  
7  
8  
9  
10  
11  
12  
13  
14  
15  
16  
17  
18  
19  
20  
21  
22  
23  
24  
25  
26  
27  
28  
29  
30  
31  
32  
33  
34  
35  
36  
37  
38  
39  
40  
41  
42  
43  
44  
45  
46  
47  
48  
49  
50  
51  
52  
53  
54  
55  
56  
57  
58  
59  
60
37. Kirmayer LJ, Weinfeld M, Burgos G, et al. Use of health care services for psychological distress by immigrants in an urban multicultural milieu. *Can J Psychiatry* 2007;52:295–304.
38. Whitley R, Kirmayer LJ, Groleau D. Understanding immigrants' reluctance to use mental health services: A qualitative study from Montreal. *Can J Psychiatry*. 2006;51:205–9

**Table 1**

| Focus Group and Interview Questions:<br><br>Young people                                                                                                                                                                                                                                                 | Focus Group and Interview Questions:<br><br>Family members                                                                                                                                                                                                                                                                                        |
|----------------------------------------------------------------------------------------------------------------------------------------------------------------------------------------------------------------------------------------------------------------------------------------------------------|---------------------------------------------------------------------------------------------------------------------------------------------------------------------------------------------------------------------------------------------------------------------------------------------------------------------------------------------------|
| <p><b>Opening question:</b></p> <p>Tell us your name and why you decided to participate in this focus group?</p> <p><b>Introductory:</b></p> <p>2. How long have you been in the program? And, if you feel like sharing it, how did you come into contact with the first-episode psychosis services?</p> | <p><b>Opening question:</b></p> <p>Tell us your name and why you decided to participate in this focus group?</p> <p><b>Introductory:</b></p> <p>2. If you feel like sharing it, how did [the person who referred you to the focus group, he/she can be your son/daughter, etc.] come into contact with mental health services the first time?</p> |

|                                                                                                                                                                                                                                                                                                                                                                                                                                                                                                                                                                                                                                                                                         |                                                                                                                                                                                                                                                                                                                                                                                                                                                                                                                                                                             |
|-----------------------------------------------------------------------------------------------------------------------------------------------------------------------------------------------------------------------------------------------------------------------------------------------------------------------------------------------------------------------------------------------------------------------------------------------------------------------------------------------------------------------------------------------------------------------------------------------------------------------------------------------------------------------------------------|-----------------------------------------------------------------------------------------------------------------------------------------------------------------------------------------------------------------------------------------------------------------------------------------------------------------------------------------------------------------------------------------------------------------------------------------------------------------------------------------------------------------------------------------------------------------------------|
| <p><b>Key questions:</b></p> <p>Based on all interviews that we conducted so far we were able to identify that: First, the help-seeking process is very complex, as you can see, many people, places, circumstances and factors are involved;</p> <p>Why do they think this happens?</p> <p>Second, we were able to identify some of the key people involved in this journey and we would like to know more from you about their roles.</p> <p>NOTE: For each provider we explore what was helpful and/or less helpful or frustrating.</p> <p>Specific question based on the analysis done (e.g., The Caribbean population have really long delays—why do they think this happens?)</p> | <p><b>Key questions:</b></p> <p>Based on all interviews that we conducted so far we were able to identify that: First, the help-seeking process is very complex, as you can see, many people, places, circumstances and factors are involved;</p> <p>Why do they think this happens?</p> <p>Second, we were able to identify some of the key people involved in this journey, you already mentioned some of them, we would like to know more from you about their roles.</p> <p>NOTE: For each provider we explore what was helpful and/or less helpful or frustrating.</p> |
| <p><b>Ending questions:</b></p> <p>We want to know how to improve the services. What can be done to better help people that experience early symptoms of psychosis to have access to treatment?</p> <p>Is there anything that we missed?</p>                                                                                                                                                                                                                                                                                                                                                                                                                                            | <p><b>Ending questions:</b></p> <p>We want to know how to improve the services. What can be done to better help people that experience early symptoms of psychosis to have access to treatment?</p> <p>Is there anything you want to say that we did not ask or you did not talk about today that you want to add?</p>                                                                                                                                                                                                                                                      |

1  
2  
3  
4  
5  
6  
7  
8  
9  
10  
11  
12  
13  
14  
15  
16  
17  
18  
19  
20  
21  
22  
23  
24  
25  
26  
27  
28  
29  
30  
31  
32  
33  
34  
35  
36  
37  
38  
39  
40  
41  
42  
43  
44  
45  
46  
47  
48  
49  
50  
51  
52  
53  
54  
55  
56  
57  
58  
59  
60



1  
2  
3  
4  
5  
6  
7  
8  
9  
10  
11  
12  
13  
14  
15  
16  
17  
18  
19  
20  
21  
22  
23  
24  
25  
26  
27  
28  
29  
30  
31  
32  
33  
34  
35  
36  
37  
38  
39  
40  
41  
42  
43  
44  
45  
46  
47  
48  
49  
50  
51  
52  
53  
54  
55  
56  
57  
58  
59  
60

For peer review only

**Table 2**

| <b>Variables</b> | <b>N</b> | <b>(%)</b> |
|------------------|----------|------------|
| Sex              |          |            |
| Male             | 13       | (52)       |
| Female           | 12       | (48)       |
| Education        |          |            |
| >High school     | 8        | (32)       |
| ≤High school     | 17       | (68)       |

|    |                        |    |      |
|----|------------------------|----|------|
| 1  |                        |    |      |
| 2  |                        |    |      |
| 3  |                        |    |      |
| 4  | Born in Canada         |    |      |
| 5  |                        |    |      |
| 6  | Yes                    | 17 | (68) |
| 7  |                        |    |      |
| 8  | No                     | 8  | (32) |
| 9  |                        |    |      |
| 10 |                        |    |      |
| 11 | English Spoken at home |    |      |
| 12 |                        |    |      |
| 13 | Yes                    | 18 | (72) |
| 14 |                        |    |      |
| 15 | No                     | 5  | (20) |
| 16 |                        |    |      |
| 17 | English and other      | 2  | (8)  |
| 18 |                        |    |      |
| 19 |                        |    |      |
| 20 | Sexual Orientation     |    |      |
| 21 |                        |    |      |
| 22 | Heterosexual           | 21 | (84) |
| 23 |                        |    |      |
| 24 | Homosexual             | 1  | (4)  |
| 25 |                        |    |      |
| 26 | Bisexual               | 2  | (8)  |
| 27 |                        |    |      |
| 28 | Other                  | 1  | (4)  |
| 29 |                        |    |      |
| 30 |                        |    |      |
| 31 |                        |    |      |
| 32 | Relationship Status    |    |      |
| 33 |                        |    |      |
| 34 | Single                 | 23 | (92) |
| 35 |                        |    |      |
| 36 | Married                | 0  | (0)  |
| 37 |                        |    |      |
| 38 | Cohabiting             | 1  | (4)  |
| 39 |                        |    |      |
| 40 | Separated/Divorced     | 1  | (4)  |
| 41 |                        |    |      |
| 42 |                        |    |      |
| 43 |                        |    |      |
| 44 | Parents Born in Canada |    |      |
| 45 |                        |    |      |
| 46 | Both                   | 5  | (20) |
| 47 |                        |    |      |
| 48 | Father Only            | 4  | (16) |
| 49 |                        |    |      |
| 50 | Mother Only            | 2  | (8)  |
| 51 |                        |    |      |
| 52 | Not born in Canada     | 14 | (56) |
| 53 |                        |    |      |
| 54 |                        |    |      |
| 55 |                        |    |      |
| 56 |                        |    |      |
| 57 |                        |    |      |
| 58 |                        |    |      |
| 59 |                        |    |      |
| 60 |                        |    |      |

1  
2  
3  
4  
5  
6  
7  
8  
9  
10  
11  
12  
13  
14  
15  
16  
17  
18  
19  
20  
21  
22  
23  
24  
25  
26  
27  
28  
29  
30  
31  
32  
33 **Table 3**  
34

- 35 1. Universal and selected prevention interventions in school are needed:  
36  
37
- 38 • Education in school settings,
  - 39
  - 40 • Early detection efforts should focus on identifying the full spectrum of psychotic  
41 symptoms. As youth described, withdrawal and, broadly, negative symptoms,  
42 often occur before the psychosis develops. However, these symptoms are often  
43 questioned and neglected by family members and health providers;  
44  
45
- 46
- 47 2. Anti-stigma initiatives are needed and should be developed through the lens of  
48 cultural knowledge of and beliefs about mental health problems;  
49
- 50
- 51 3. Increased family involvement should be encouraged;  
52
- 53 4. Self-referral to early intervention services may be beneficial and the possibility for  
54 a triage model should be explored;  
55  
56  
57  
58  
59  
60

- 1
  - 2
  - 3
  - 4
  - 5
  - 6
  - 7
  - 8
  - 9
  - 10
  - 11
  - 12
  - 13
  - 14
  - 15
  - 16
  - 17
  - 18
  - 19
  - 20
  - 21
  - 22
  - 23
  - 24
  - 25
  - 26
  - 27
  - 28
  - 29
  - 30
  - 31
  - 32
  - 33
  - 34
  - 35
  - 36
  - 37
  - 38
  - 39
  - 40
  - 41
  - 42
  - 43
  - 44
  - 45
  - 46
  - 47
  - 48
  - 49
  - 50
  - 51
  - 52
  - 53
  - 54
  - 55
  - 56
  - 57
  - 58
  - 59
  - 60
5. Sensitivity training should be offered for general practitioners and emergency staff on recognition, mental illness/gender bias resources, and services;
6. Sensitivity training should be offered for police and detention center staff.

For peer review only
